1 Differential adhesion regulates neurite placement via a  
2 retrograde zippering mechanism  
3

4 **Authors:** Titas Sengupta<sup>1</sup>, Noelle L. Koonce<sup>1</sup>, Mark W. Moyle<sup>1</sup>, Leighton H. Duncan<sup>1</sup>,  
5 Nabor Vázquez-Martínez<sup>1</sup>, Sarah E. Emerson<sup>1</sup>, Xiaofei Han<sup>2</sup>, Lin Shao<sup>1</sup>, Yicong Wu<sup>2</sup>,  
6 Anthony Santella<sup>3</sup>, Li Fan<sup>3</sup>, Zhirong Bao<sup>3</sup>, William A. Mohler<sup>5</sup>, Hari Shroff<sup>2, 4</sup>, Daniel A.  
7 Colón-Ramos<sup>1, 4, 6,\*</sup>

8

9 **Affiliations:**

10 1. Department of Neuroscience and Department of Cell Biology, Yale University School of  
11 Medicine, New Haven, CT 06536, USA.

12 2. Laboratory of High Resolution Optical Imaging, National Institute of Biomedical Imaging  
13 and Bioengineering, National Institutes of Health, Bethesda, MD 20892, USA.

14 3. Developmental Biology Program, Sloan Kettering Institute, New York, NY 10065, USA.

15 4. MBL Fellows, Marine Biological Laboratory, Woods Hole, MA 02543, USA

16 5. Department of Genetics and Genome Sciences and Center for Cell Analysis and  
17 Modeling, University of Connecticut Health Center, Farmington, CT 06030, USA.

18 6. Instituto de Neurobiología, Recinto de Ciencias Médicas, Universidad de Puerto Rico,  
19 San Juan 00901, Puerto Rico.

20

21 \*Correspondence to:

22 Daniel A. Colón-Ramos, Ph.D.  
23 Department of Neuroscience  
24 Department of Cell Biology  
25 Yale University School of Medicine  
26 333 Cedar Street  
27 SHM B 163D  
28 New Haven, CT 06510  
29 Email: [daniel.colon-ramos@yale.edu](mailto:daniel.colon-ramos@yale.edu)

30

31

32

33

34

35

36 **Abstract**

37 During development, neurites and synapses segregate into specific neighborhoods or  
38 layers within nerve bundles. The developmental programs guiding placement of neurites  
39 in specific layers, and hence their incorporation into specific circuits, are not well  
40 understood. We implement novel imaging methods and quantitative models to  
41 document the embryonic development of the *C. elegans* brain neuropil, and discover  
42 that differential adhesion mechanisms control precise placement of single neurites onto  
43 specific layers. Differential adhesion is orchestrated via developmentally-regulated  
44 expression of the IgCAM SYG-1, and its partner ligand SYG-2. Changes in SYG-1  
45 expression across neuropil layers result in changes in adhesive forces, which sort SYG-  
46 2-expressing neurons. Sorting to layers occurs, not via outgrowth from the neurite tip,  
47 but via an alternate mechanism of retrograde zippering, involving interactions between  
48 neurite shafts. Our study indicates that biophysical principles from differential adhesion  
49 govern neurite placement and synaptic specificity *in vivo* in developing neuropil bundles.

50

51

52

53

54

55

56

57

58

## 59 **Introduction**

60           In brains, neuronal processes or neurites are segregated away from cell bodies  
61 into synapse-rich regions termed neuropils: dense structures of nerve cell extensions  
62 which commingle to form functional circuits (Maynard, 1962). In both vertebrates and  
63 invertebrates, placement of neurites into specific neighborhoods results in a laminar  
64 organization of the neuropil (Kolodkin and Hiesinger, 2017, Millard and Pecot, 2018,  
65 Nevin et al., 2008, Sanes and Zipursky, 2010, Schürmann, 2016, Soiza-Reilly and  
66 Commons, 2014, Xu et al., 2020, Zheng et al., 2018). The laminar organization  
67 segregates specific information streams within co-located circuits and is a major  
68 determinant of synaptic specificity and circuit connectivity (Baier, 2013, Gabriel et al.,  
69 2012, Missaire and Hindges, 2015, Moyle et al., 2021, Nguyen-Ba-Charvet and  
70 Chedotal, 2014, White et al., 1986, Xie et al., 2017). The developmental programs  
71 guiding placement of neurites along specific layers, and therefore circuit architecture  
72 within neuropils, are not well understood.

73           The precise placement of neurites within layered structures cannot be exclusively  
74 explained by canonical tip-directed outgrowth dynamics seen during developmental  
75 axon guidance (Tessier-Lavigne and Goodman, 1996). Instead, ordered placement of  
76 neurites resulting in layered patterns appears to occur via local cell-cell recognition  
77 events. These local cell-cell recognition events are modulated by the regulated  
78 expression of specific cell adhesion molecules (CAMs) that place neurites, and  
79 synapses, onto layers (Aurelio et al., 2003, Kim and Emmons, 2017, Lin et al., 1994,  
80 Petrovic and Hummel, 2008, Poskanzer et al., 2003, Schwabe et al., 2019). For  
81 example, studies in both the mouse and fly visual systems have revealed important

82 roles for the regulated spatio-temporal expression of IgSF proteins, such as Sidekick,  
83 Dscam and Contactin, in targeting synaptic partner neurons to distinct layers or  
84 sublayers (Duan et al., 2014, Sanes and Zipursky, 2010, Tan et al., 2015, Yamagata  
85 and Sanes, 2008, Yamagata and Sanes, 2012). In *C. elegans* nerve bundles, neurite  
86 position is established and maintained via combinatorial, cell-specific expression of  
87 CAMs which mediate local neurite interactions and, when altered, lead to reproducible  
88 defects in neurite order within bundles (Kim and Emmons, 2017, Yip and Heiman,  
89 2018). How these local, CAM-mediated interactions are regulated during development  
90 and how they result in the segregation of neurites into distinct layers, are not well  
91 understood.

92 Differential expression of cell adhesion molecules (CAMs) in cells from early  
93 embryos can drive their compartmentalization (Foty and Steinberg, 2005, Foty and  
94 Steinberg, 2013, Steinberg, 1962, Steinberg, 1963, Steinberg, 1970, Steinberg and  
95 Takeichi, 1994). This compartmentalization is in part regulated by biophysical principles  
96 of cell adhesion and surface tension which can give rise to tissue-level patterns and  
97 boundaries (Canty et al., 2017, Duguay et al., 2003, Erzberger et al., 2020, Foty et al.,  
98 1996, Schotz et al., 2008). For example, morphogenic developmental processes such  
99 as the patterning of the *Drosophila* germline and retina, the germ layer organization in  
100 zebrafish, and the sorting of motor neuron cell bodies into discrete nuclei in the ventral  
101 spinal cord can be largely explained via differential adhesion mechanisms and cortical  
102 contraction forces that contribute to cell sorting (Bao and Cagan, 2005, Bao et al., 2010,  
103 Godt and Tepass, 1998, Gonzalez-Reyes and St Johnston, 1998, Krieg et al., 2008,  
104 Price et al., 2002, Schotz et al., 2008). While differential adhesion is best understood in

105 the context of the sorting of cell bodies in early embryogenesis, recent  
106 neurodevelopmental work supports that this mechanism influences sorting of neuronal  
107 processes *in vivo* as well. For example, differential expression of N-cadherin in the  
108 *Drosophila* visual system underlies the organization of synaptic-partnered neurites  
109 (Schwabe et al., 2019), where changes in the relative levels of N-cadherin are sufficient  
110 to determine placement of neurites within nerve bundles. Whether differential adhesion  
111 acts as an organizational principle within layered neuropils to regulate precise  
112 placement of neurites is not known.

113 Here we examine the developmental events that lead to placement of the AIB  
114 interneurons in the *C. elegans* nerve ring. The *C. elegans* nerve ring is a layered  
115 neuropil, with specific strata functionally segregating sensory information and motor  
116 outputs (Brittin et al., 2021, Moyle et al., 2021, White et al., 1986). A highly  
117 interconnected group of neurons referred to as the ‘rich club’ neurons, and which  
118 include interneuron AIB, functionally link distinct strata via precise placement of their  
119 neurites (Moyle et al., 2021, Sabrin et al., 2019, Towlson et al., 2013). Each AIB  
120 interneuron projects a single neurite, but segments of that single neurite are placed  
121 along distinct and specific layers in the *C. elegans* nerve ring (Fig. 1). The sequence of  
122 events resulting in the precise placement of AIB along defined nerve ring layers is  
123 unexplored, primarily owing to limitations in visualizing these events *in vivo* during  
124 embryonic stages.

125 We implemented novel imaging methods and deep learning approaches to yield  
126 high-resolution images of AIB during embryonic development. We discovered that  
127 placement of the AIB neurite depends on coordinated retrograde zipper mechanisms

128 that align segments of the AIB neurite onto specific neuropil layers. Quantitative  
129 analysis and modeling of our *in vivo* imaging data revealed that biophysical principles of  
130 differential adhesion influence the observed retrograde zippering mechanisms that  
131 result in the sorting of the AIB neurite shaft onto distinct neuropil strata. We performed  
132 genetic screens to identify the molecular mechanisms underpinning these differential  
133 adhesion mechanisms, discovering a role for the IgCAM receptor *syg-1* and its ligand,  
134 *syg-2*. We determined that *syg-2* acts in AIB to instruct neurite placement across strata,  
135 while *syg-1* is required non-cell autonomously, and at specific layers. Temporally-  
136 regulated expression of SYG-1 alters adhesive forces during development to sort  
137 segments of AIB onto specific layers. Ectopic expression of SYG-1 predictably affects  
138 differential adhesion across layers, repositioning the AIB neurite segments in a SYG-2-  
139 dependent manner. Our findings indicate that conserved principles of differential  
140 adhesion drive placement of neurites, and *en passant* synaptic specificity, in layered  
141 neuropils.

142

## 143 **Results**

144

### 145 **Examination of AIB neurite architecture in the context of the nerve ring** 146 **strata**

147 First, we characterized the precise placement and synaptic distribution of the AIB  
148 neurite within the nerve ring neuropil strata. From electron microscopy connectome  
149 datasets and *in-vivo* imaging, we observed that the AIB neurite is unipolar, with its

150 single neurite placed along two distinct and specific strata of the nerve ring (Fig. 1,  
151 Supplementary Movies 1-3).

152         Connectomic studies have identified AIB as a “rich club” neuron, a connector hub  
153 that links nodes in different functional modules of the brain (Sabrin et al., 2019, Towilson  
154 et al., 2013). We observed that AIB’s role as a connector hub was reflected in its  
155 architecture within the context of the layered nerve ring (Fig. 1K-N, Supplementary Fig.  
156 1, Supplementary Fig. 2). For example, the AIB neurite segment in the posterior  
157 neighborhood is enriched in postsynaptic specializations, enabling it to receive sensory  
158 information from the adjacent sensory neurons that reside in that neighborhood  
159 (Supplementary Fig. 2; (White et al., 1983, White et al., 1986)). AIB relays this sensory  
160 information onto the anterior neighborhood, where the AIB neurite elaborates  
161 presynaptic specializations that innervate neighboring motor interneurons (Fig. 1D, E, I,  
162 J; Supplementary Fig. 2A-G, Supplementary Movie 5). The architecture of AIB is  
163 reminiscent of that of amacrine cells of the inner plexiform layer (Demb and Singer,  
164 2012, Kolb, 1995, Kunzevitzky et al., 2013, Robles et al., 2013, Strettoi et al., 1992,  
165 Taylor and Smith, 2012), which serve as hubs by distributing their neurites and  
166 synapses across distinct and specific sublaminae of the vertebrate retina (Marc et al.,  
167 2014). We set out to examine how this architecture was laid out during development.

168

## 169 **A retrograde zippering mechanism positions the AIB neurites in the** 170 **anterior neighborhood during embryonic development**

171         Prior to this study, using characterized cell-specific promoters, AIB could be  
172 visualized in larvae (Altun et al., 2008, Kuramochi and Doi, 2019) but not in embryos,

173 when placement of AIB into the neighborhoods is specified (Supplementary Fig. 2A  
174 shows that by earliest postembryonic stage, L1, AIB neurite placement is complete,  
175 indicating placement occurs in the embryo). Moreover, continuous imaging of  
176 neurodevelopmental events in embryos, necessary for documenting AIB development,  
177 presents unique challenges regarding phototoxicity, speeds of image acquisition as it  
178 relates to embryonic movement, and the spatial resolution necessary to discern multiple  
179 closely-spaced neurites in the embryonic nerve ring (Wu et al., 2011). These barriers  
180 prevented documentation of AIB neurodevelopmental dynamics. To address these  
181 challenges, we first adapted a subtractive labeling strategy for sparse labeling and  
182 tracking of the AIB neurites in embryos (detailed in Methods, Supplementary Fig. 3A-C,  
183 Supplementary Movie 6, (Armenti et al., 2014)). We then adapted use of novel imaging  
184 methods, including dual-view light-sheet microscopy (diSPIM) (Kumar et al., 2014, Wu  
185 et al., 2013) for long-term isotropic imaging, and a triple-view line-scanning confocal  
186 imaging and deep-learning framework for enhanced resolution (Supplementary Fig.  
187 3D,E; (Weigert et al., 2018, Wu et al., 2016); Wu et al., in prep).

188 Using these methods, we observed that the AIB neurites enter the nerve ring  
189 during the early embryonic elongation phase, ~400 minutes post fertilization (m.p.f). The  
190 two AIB neurites then circumnavigate the nerve ring at opposite sides of the neuropil -  
191 both AIBL and AIBR project dorsally along the posterior neighborhood, on the left and  
192 right-hand sides of the worm, respectively (Fig. 2A,B). Simultaneous outgrowth of AIBL  
193 and AIBR neurons in the posterior neighborhood results in their neurites  
194 circumnavigating the ring and meeting at the dorsal midline of the nerve ring (Fig. 2C).



195 Therefore, proper placement of the proximal segment of the AIB neurite in the posterior  
196 neighborhood occurs by AIB outgrowth along neurons in this neighborhood (Fig. 2A-F).

197 After meeting at the dorsal midline, instead of making a shift to the anterior  
198 neighborhood (as expected from the adult AIB neurite morphology – see Fig. 1M,N), the  
199 AIB neurites, surprisingly, continue growing along the posterior neighborhood (Fig.  
200 2C,D; 480 m.p.f.). At approximately 505 m.p.f., each AIB neurite separates from the  
201 posterior neighborhood, starting at its growth cone, by growing tangentially to the  
202 posterior neighborhood (the posterior neighborhood is marked in Fig. 2A-G by its lateral  
203 counterpart, i.e., the other AIB, also see Supplementary Fig. 3I,J). The departure of the  
204 AIB growth cone occurs due to the AIB neurite growing in a straight path trajectory  
205 instead of following the bending nerve ring arc (Supplementary Fig. 3I,J). Because it  
206 has been documented that axons tend to ‘grow straight’ on surfaces lacking adhesive  
207 forces that instruct turning (Katz, 1985), we hypothesize that the observed exit (via  
208 ‘straight outgrowth’) could result from decreased adhesion to the posterior  
209 neighborhood (Supplementary Fig. 3I,J).

210 As it grows tangentially to the posterior neighborhood, the AIB neurite cuts  
211 orthogonally through the nerve ring and towards the anterior neighborhood  
212 (Supplementary Fig. 3I,J). Upon intersecting the anterior neighborhood, the AIB neurite  
213 reengages with the arc of the nerve ring. At this developmental stage (Fig 2I), only 3.9%  
214 of the AIB distal neurite is placed in the anterior neighborhood, with the remainder still  
215 being positioned in the posterior neighborhood and between neighborhoods. Following  
216 this, we observed a repositioning of the AIB neurite, but not via expected tip-directed  
217 fasciculation. Instead, the entire shaft of the distal AIB neurite was peeled away from

218 the posterior neighborhood and repositioned onto the anterior neighborhood, starting  
219 from the tip of the neurite and progressively ‘zippering’ in a retrograde fashion towards  
220 the cell body (Fig. 2J,K; the overlap of the AIB neurite with the anterior neighborhood  
221 increased from 3.9% at 515 m.p.f. to 30.4% at 530 m.p.f. and 71.7% at 545 m.p.f.).  
222 Retrograde zippering stopped at the dorsal midline of the nerve ring (~545 m.p.f.),  
223 resulting in the AIB architecture observed in postembryonic larval and adult stages (Fig.  
224 2L). The progressive zippering of the AIB neurite onto the anterior neighborhood occurs  
225 concurrently with its separation from the posterior neighborhood (Fig. 2M), a converse  
226 process which we refer to as ‘unzippering’. The *in vivo* developmental dynamics of AIB  
227 repositioning, via retrograde zippering onto the anterior neighborhood, are reminiscent  
228 of dynamics observed in cultures of vertebrate neurons in which biophysical forces drive  
229 ‘zippering’ of neurite shafts, and the bundling of neurons (Smit et al., 2017).

230

### 231 **Biophysical modeling of AIB developmental dynamics is consistent with** 232 **differential adhesion leading to retrograde zippering**

233 Dynamics of neurite shaft zippering have been previously documented (Barry et  
234 al., 2010, Voyiadjis et al., 2011) and modeled in tissue culture cells (Smit et al., 2017),  
235 and described as resulting from two main forces: neurite-neurite adhesion (represented  
236 as “S”) and mechanical tension (represented as “T”). To better understand the  
237 underlying mechanisms of AIB neurite placement, we analyzed AIB developmental  
238 dynamics in the context of these known forces that affect neurite zippering. In each  
239 neighborhood, the developing AIB neurite experiences two forces: (i) adhesion to  
240 neurons in that neighborhood and (ii) tension due to mechanical stretch. As the neurite

241 zippers and unzippers, it has a velocity in the anterior neighborhood (a zippering  
242 velocity,  $v_{zip}$ ) and a velocity in the posterior neighborhood (an unzipping velocity,  
243  $v_{unzip}$ ) (Fig. 3 and Supplementary Note). These velocities are related to the forces on  
244 the neurite by the following equation:

$$246 \quad v_{zip} + v_{unzip} = \frac{(S_{anterior} - S_{posterior})}{\eta} - \frac{\Delta T}{\eta} (1 - \cos\theta)$$

247  
248 where  $v_{zip}$  = zippering velocity,  $v_{unzip}$  = unzipping velocity,  $S_{anterior} - S_{posterior}$  =  
249 difference between adhesive forces in the two neighborhoods,  $\Delta T = T_{anterior} -$   
250  $T_{posterior}$  = difference between tension acting on the AIB neurite in the two  
251 neighborhoods,  $\eta$  = friction constant (see Supplementary Note) and  $\theta$  = angle of the AIB  
252 neurite to the neighborhoods (Fig. 3 and Supplementary Note). Since the above  
253 biophysical equation defines the relationship between velocities and forces, we  
254 measured the velocities of the neurite from our time-lapse images to make predictions  
255 about the forces on the neurite.

256 Time lapse images and measurements of the developmental dynamics showed  
257 that zippering and unzipping takes place concurrently: zippering on to the anterior  
258 neighborhood and unzipping from the posterior one (Fig. 3C). Between 505-545  
259 m.p.f., the average length of the AIB neurite that is placed in the anterior neighborhood  
260 (4.49  $\mu\text{m}$ ) by retrograde zippering is similar to the length that is unzipped from the  
261 posterior neighborhood (4.13  $\mu\text{m}$ ). Assuming, based on previous studies (Smit et al.,  
262 2017), that the tension forces are uniformly distributed along the neurite (and therefore

263  $\Delta T = T_{anterior} - T_{posterior} = 0$ ), zippering and unzippering velocities arise from a  
264 difference in adhesion ( $S_{anterior} - S_{posterior} > 0$ ) (see Supplementary Note).

265 Measurements of *in vivo* zippering velocities (Fig. 3D) support this hypothesis.  
266 Examination of our time-lapse images revealed that AIB neurite zippering onto the distal  
267 neighborhood takes place at higher velocities at later timepoints (with mean zippering  
268 velocity increasing from 0.09  $\mu\text{m}/\text{min}$  at 515 mins to 0.34  $\mu\text{m}/\text{min}$  at 530 mins) (Fig. 3D).  
269 This increased velocity, or acceleration, is a hallmark of force imbalance and consistent  
270 with a net increase in adhesive forces in the anterior neighborhood during the period in  
271 which zippering takes place. We note that retrograde zippering comes to a stop  
272 precisely at the dorsal midline, likely owing to the adhesion and tension forces on the  
273 neurite in the two neighborhoods balancing out at this point. Together, the  
274 developmental dynamics observed for AIB neurite placement are consistent with  
275 relative changes in adhesive forces between the neighborhoods. This suggests that  
276 dynamic mechanisms resulting in differential adhesion might govern AIB neurite  
277 repositioning.

278

## 279 **SYG-1 and SYG-2 regulate precise placement of the AIB neurite to the** 280 **anterior neighborhood**

281 To identify the molecular mechanism underpinning differential adhesion for AIB  
282 neurodevelopment, we performed forward and reverse genetic screens. We discovered  
283 that loss-of-function mutant alleles of *syg-1* and *syg-2*, which encode a pair of  
284 interacting Ig family cell adhesion molecules (IgCAMs), display significant defects in the  
285 placement of the AIB neurite. In wild type animals, we reproducibly observed complete

286 overlap between the AIB distal neurite and neurons in the anterior neighborhood (Fig.  
287 4A-D), consistent with EM characterizations (Supplementary Fig. 2A,B). In contrast,  
288 76.3% of *syg-1(ky652)* animals and 60% of *syg-2(ky671)* animals (compared to 1.8% of  
289 wild type animals) showed regions of AIB detachment from neurons specifically in the  
290 anterior neighborhood (Fig. 4E-L; we note we did not detect defects in general  
291 morphology of the nerve ring, in the length of the AIB distal neurite, or in position of the  
292 AIB neurite in the posterior neighborhood for these mutants, Supplementary Fig. 4). In  
293 the *syg-1(ky652)* and *syg-2(ky671)* animals that exhibit defects in AIB neurite  
294 placement, we found that  $21.49\pm 4.0\%$  and  $17.33\pm 3.9\%$  (respectively) of the neurite  
295 segment in the anterior neighborhood is detached from the neighborhood (Fig. 4M). Our  
296 findings indicate that SYG-1 and SYG-2 are required for correct placement of AIB,  
297 specifically to the anterior neighborhood.

298         The IgCAMs SYG-1 and SYG-2 are a receptor-ligand pair that has been best  
299 characterized in the context of regulation of synaptogenesis in the *C. elegans* egg-  
300 laying circuit (Shen and Bargmann, 2003, Shen et al., 2004). SYG-1 (Rst and Kirre in  
301 *Drosophila* and Kirrel1/2/3 in mammals) and SYG-2 (Sns and Hibris in *Drosophila*, and  
302 Nephtrin in mammals) orthologs also act as multipurpose adhesion molecules in varying  
303 conserved developmental contexts (Bao and Cagan, 2005, Bao et al., 2010, Chao and  
304 Shen, 2008, Garg et al., 2007, Neumann-Haefelin et al., 2010, Ozkan et al., 2014,  
305 Oztokatli et al., 2012, Serizawa et al., 2006, Shen and Bargmann, 2003, Shen et al.,  
306 2004, Strunkelberg et al., 2001). In most of the characterized *in vivo* contexts, SYG-1  
307 has been shown to act heterophilically with SYG-2 (Dworak et al., 2001, Ozkan et al.,  
308 2014, Shen et al., 2004). Consistent with SYG-1 and SYG-2 acting jointly for precise

309 placement of the AIB neurite *in vivo*, we observed that a double mutant of the *syg-*  
310 *1(ky652)* and *syg-2 (ky671)* loss-of-function alleles did not enhance the AIB distal  
311 neurite placement defects as compared to either single mutant (Fig. 4N).

312 To determine the site of action of these two molecules, we expressed them cell-  
313 specifically in varying tissues. We observed that SYG-2 expression in AIB was sufficient  
314 to rescue the AIB distal neurite placement defects in the *syg-2(ky671)* mutants,  
315 suggesting that SYG-2 acts cell autonomously in AIB. While expression of wild-type  
316 SYG-1 (via a cosmid) rescued AIB neurite placement onto the anterior neighborhood,  
317 expression of SYG-1 using an AIB cell-specific promoter did not (Fig. 4N), consistent  
318 with SYG-1 regulating AIB neurite placement cell non-autonomously.

319

### 320 **Increased local expression of SYG-1 in the anterior neighborhood** 321 **coincides with zippering of the AIB neurite onto this neighborhood**

322 To understand how SYG-1 coordinates placement of the AIB neurite, we examined  
323 the expression of transcriptional and translational reporters of SYG-1 in the nerve ring of  
324 wild type animals. In postembryonic, larva-stage animals (L3 and L4), we observed  
325 robust expression of the *syg-1* transcriptional reporter in a banded pattern in ~20  
326 neurons present in the AIB posterior and anterior neighborhoods, with specific  
327 enrichment in the anterior neighborhood (Fig. 5A-E). The SYG-1 translational reporter,  
328 which allowed us to look at SYG-1 protein accumulation, also showed a similar  
329 expression pattern (Fig. 5F-I). To understand how SYG-1 regulates placement of the  
330 AIB neurite during development, we examined spatiotemporal dynamics of expression

331 of SYG-1 during embryogenesis at the time of AIB neurite placement (400-550 m.p.f.)  
332 (Fig. 2), using both the transcriptional and translational *syg-1* reporters.

333 Prior to 470 m.p.f., *syg-1* reporter expression in the nerve ring was primarily  
334 restricted to a single band corresponding to the AIB posterior neighborhood (Fig.  
335 5K,O,O'). This coincides with periods of outgrowth and placement of the AIB neurons in  
336 the posterior neighborhood. However, over the subsequent three hours of  
337 embryogenesis (470-650 m.p.f.), SYG-1 expression levels progressively increase in the  
338 anterior neighborhood while decreasing in the posterior neighborhood (Fig. 5L-R',  
339 Supplementary Fig. 5, Supplementary Movie 7). The change in expression levels of  
340 SYG-1 across neighborhoods coincides with the relocation of the AIB neurite, from the  
341 posterior to the anterior neighborhood via retrograde zippering (Fig. 5S). Our  
342 observations *in vivo* are consistent with reported SYG-1 expression levels from  
343 embryonic transcriptomics data (Packer et al., 2019), which demonstrate similar SYG-1  
344 expression changes in neurons in the anterior and posterior neighborhoods of AIB  
345 (Supplementary Table 1). The transcriptomic studies also demonstrate a ten-fold  
346 increase in SYG-2 transcript levels in AIB at the time in which the AIB neurite transitions  
347 between neighborhoods (and consistent with our findings that SYG-2 acts cell  
348 autonomously in AIB). Together with the biophysical analyses, our data suggests that  
349 spatiotemporal changes in SYG-1 and SYG-2 expression might result in changes in  
350 forces that drive differential adhesion of AIB neurites via retrograde zippering of their  
351 axon shafts.

352

353 **Ectopic *syg-1* expression is sufficient to alter placement of the AIB distal**  
354 **neurite**

355 To test whether coincident SYG-1 expression in the anterior neighborhood was  
356 responsible for repositioning of AIB to that neighborhood, we set to identify and  
357 manipulate the sources of SYG-1 expression. We found that increases of SYG-1 in the  
358 anterior neighborhood were caused by (i) ingrowth of SYG-1-expressing neurons into  
359 the anterior neighborhood and (ii) onset of *syg-1* expression in neurons of the anterior  
360 neighborhood (Supplementary Fig. 5). We observed strong and robust SYG-1  
361 expression in the RIM neurons, the primary postsynaptic partner of AIB, both in  
362 embryonic and postembryonic stages, leading us to hypothesize that SYG-1 expression  
363 in RIM neurons contributes to AIB neurite placement (Supplementary Fig. 6). To test  
364 this hypothesis, we ablated RIM neurons. We observed that RIM ablations result in  
365 defects in AIB neurite placement which phenocopied those seen for *syg-1* loss-of-  
366 function mutants (Supplementary Fig. 7). We also observed that expression of SYG-1  
367 specifically in RIM and RIC neurons in *syg-1(ky652)* mutants was sufficient to position  
368 the AIB distal neurite along these neurons (Supplementary Fig. 7P-Q').

369 If differences in SYG-1 expression level between the neighborhoods results in  
370 differential adhesion, and consequent relocation of the AIB distal neurite from the  
371 posterior to the anterior neighborhood, then purposefully altering these differences  
372 should predictably alter the position of the AIB neurite. We aimed to test this hypothesis  
373 by inverting the adhesion differential through the overexpression of SYG-1 in the  
374 posterior neighborhood (see Methods). Unlike wild type and *syg-1* mutants (Fig. 6A-F,  
375 Supplementary Fig. 8A,B), animals with ectopic *syg-1* expression in the posterior



376 neighborhood displayed a gain-of-function phenotype, in which the AIB distal neurite  
377 remained partially positioned in the posterior neighborhood throughout postembryonic  
378 larval stages (Fig. 6G-J, Supplementary Fig. 8A,B). Importantly, these gain-of-function  
379 effects caused by ectopic expression of SYG-1 are not observed in a *syg-2(ky671)*  
380 mutant background, consistent with SYG-2 expression in AIB being required for AIB's  
381 repositioning to the SYG-1 expressing layers. Our findings indicate that inverting the  
382 adhesion differential via enrichment of SYG-1 in the 'wrong' neighborhood predictably  
383 affects relocation of the AIB distal neurite in a way that is consistent with differential  
384 adhesion mechanisms.

385         We reasoned that if differential adhesion mechanisms were driving zippering of  
386 the AIB neurite during development, expression of the SYG-1 ectodomain would be  
387 sufficient to drive the ectopic interactions upon misexpression (Chao and Shen, 2008,  
388 Galletta et al., 2004, Gerke et al., 2003). Indeed, expression of the SYG-1 ectodomain  
389 in the posterior neighborhood resulted in gain-of-function phenotypes for AIB neurite  
390 placement, similar to those seen with misexpression of full-length SYG-1 (although  
391 penetrance of these effects was lower than that observed with full-length SYG-1).  
392 Consistent with the importance of adhesion-based mechanisms in the observed  
393 phenotypes, ectopic expression of the SYG-1 endodomain in the posterior  
394 neighborhood did not result in mislocalization of AIB (Supplementary Fig. 8A,B).

395

396 **AIB neurite placement by retrograde zippering, and presynaptic assembly**  
397 **are coordinated during development**

398 AIB displays a polarized distribution of pre- and postsynaptic specializations, and  
399 these specializations specifically localize to the neurite segments occupying the anterior  
400 and posterior neighborhoods, respectively. The placement of the AIB neurite in the  
401 anterior and posterior neighborhoods and its synaptic polarity underlies its role as a  
402 connector hub across layers (Sabrin et al., 2019, Towlson et al., 2013). To understand  
403 how the distribution of presynaptic specializations relates to the placement of the AIB  
404 neurite, we imaged the subcellular localization of presynaptic protein RAB-3 during AIB  
405 embryonic development. We observed that presynaptic proteins populate the AIB  
406 neurite starting from the tip towards the dorsal midline, in a retrograde pattern  
407 reminiscent of the retrograde zippering that places the AIB neurite in the anterior  
408 neighborhood (Fig. 7A-I). The timing of formation of presynaptic sites suggested that  
409 that the process of synaptogenesis closely followed the retrograde zippering  
410 mechanisms of AIB repositioning, indicating that zippering, and presynaptic assembly,  
411 coincide during development. Consistent with the importance of AIB neurite placement  
412 in the anterior neighborhood for correct synaptogenesis, we observed that in *syg-*  
413 *1(ky652)*, RAB-3 signal was specifically and consistently reduced in regions of the AIB  
414 distal neurite incapable of repositioning to the anterior neighborhood (Supplementary  
415 Fig. 8C-N). Overall, our study identified a role for differential adhesion in regulating  
416 neurite placement via retrograde zippering, which in turn influences synaptic specificity  
417 onto target neurons (Fig. 7J).

418

## 419 **Discussion**

420           The precise assembly of the cellular architecture of AIB in the context of the  
421 layered nerve ring neuropil underwrites its role as a “rich-club” neuron. AIB was  
422 identified, through graph theory analyses, as a rich-club neuron (Towlson et al., 2013) -  
423 a connector hub with high betweenness centrality, which links nodes of the *C. elegans*  
424 neural networks with high efficiency. We observe that the AIB neurite segments are  
425 precisely placed on distinct functional layers of the nerve ring neuropil, and that the  
426 placement of these segments, in the context of the pre- and postsynaptic polarity of the  
427 neurite, enables AIB to receive inputs from one neighborhood and relay information to  
428 the other, thereby linking otherwise modular and functionally distinct layers. Our  
429 connectomic analyses and *in vivo* imaging reveal that these features of AIB architecture  
430 are stereotyped across examined *C. elegans* animals, even as early as the first larval  
431 stage, L1. They are also evolutionarily conserved in nematodes, as examination of AIB  
432 in the connectome of the nematode *Pristionchus pacificus*, which is separated from *C.*  
433 *elegans* by 100 million years of evolutionary time, revealed similar design principles  
434 (Hong et al., 2019). The architecture of AIB is reminiscent to that seen for other “nexus  
435 neurons” in layered neuropils, such as All amacrine cells in the inner plexiform layer of  
436 the vertebrate retina (Marc et al., 2014). Like AIB, All amacrine cells receive inputs from  
437 one laminar neighborhood (rod bipolar axon terminals in “lower sublamina b”) and  
438 produce outputs onto a different neighborhood (ganglion cell dendrites in “sublamina a”)  
439 (Kolb, 1995, Strettoi et al., 1992). For these nexus neurons, as for AIB, the precise  
440 placement within neuropil layers is critical for their function and connectivity. We now  
441 demonstrate that for AIB, this precise placement is governed via differential adhesion  
442 instructed by the layer-specific expression of IgCAM SYG-1. Interestingly, other ‘rich-

443 club' neurons that emerged from connectomic studies, such as AVE and RIB, are also  
444 placed along SYG-1-expressing nerve ring layers, suggesting that similar, SYG-1  
445 dependent and layer-specific mechanisms could underpin placement of these neurons.

446 Differential adhesion acts via retrograde zippering mechanisms to position AIB  
447 across multiple and specific layers. We established new imaging paradigms to  
448 document *in vivo* embryonic development of AIB, and observed that the sorting of its  
449 distal neurite segment onto the anterior neighborhood occurs, not via tip-directed  
450 fasciculation as we had anticipated, but via neurite-shaft retrograde zippering. Zippering  
451 mechanisms had been previously documented (Barry et al., 2010, Voyiadjis et al.,  
452 2011), and modeled, for tissue culture cells, where they were shown to act via  
453 biophysical forces of tension and adhesion (Smit et al., 2017). We now demonstrate that  
454 retrograde zippering also acts *in vivo* to precisely place segments of the AIB neurite in  
455 specific neuropil layers.

456 Retrograde zippering depends on differential adhesion across layers, and is  
457 instructed by the dynamic expression of SYG-1, and its interaction with the SYG-2  
458 expressing AIB neurons. The observed role of SYG-1 in the nerve ring is reminiscent of  
459 the role of the SYG-1 and SYG-2 mammalian orthologs, Kirrel2 and Kirrel3, in axon  
460 sorting in the olfactory system (Serizawa et al., 2006), and consistent with observations  
461 in *C. elegans* that *syg-2* loss of function mutants result in defasciculation defects of the  
462 HSNL axon (Shen et al., 2004). Our findings are also consistent with studies on the  
463 roles of SYG-1 and SYG-2 *Drosophila* orthologues, Hibris and Roughest, in tissue  
464 morphogenesis of the pupal eye (Bao and Cagan, 2005). In these studies, Hibris and  
465 Roughest were shown to instruct complex morphogenic patterns by following simple,

466 adhesion and surface energy-based biophysical principles that contributed to  
467 preferential adhesion of specific cell types. We now demonstrate that similar biophysical  
468 principles of differential adhesion might help organize neurite placement within  
469 heterogeneous tissues, such as neuropils in nervous systems.

470 SYG-1 and SYG-2 coordinate developmental processes that result in synaptic  
471 specificity for the AIB interneurons. Synapses in *C. elegans* are formed *en passant*, or  
472 along the length of the axon, similar to how they are assembled in the CNS for many  
473 circuits (Jontes et al., 2000, Koestinger et al., 2017). Placement of neurites within  
474 layers therefore restrict synaptic partner choice. We examined how these events of  
475 placement, and synaptogenesis, were coordinated for the AIB interneurons and  
476 observed coincidence of presynaptic assembly and retrograde zippering of the AIB  
477 neurite. SYG-1 and SYG-2 were identified in *C. elegans* for their role in synaptic  
478 specificity (Shen and Bargmann, 2003, Shen et al., 2004), and the assembly of synaptic  
479 specializations can result in changes in the cytoskeletal structure and adhesion  
480 junctions (Missler et al., 2012). We hypothesize that coordinated assembly of synaptic  
481 sites during the process of retrograde zippering could provide forces that stabilize  
482 zippered stretches of the neurite. These could in turn “button” and fasten the AIB neurite  
483 onto the anterior layer, securing its relationship with its postsynaptic partner. Consistent  
484 with this hypothesis, we observe that ablation of one of its main postsynaptic partners,  
485 the RIM neurons, results in defects in AIB placement in the anterior neighborhood.  
486 Given the important role of adhesion molecules in coordinating cell-cell interactions and  
487 synaptogenesis (Sanes and Zipursky, 2010, Sanes and Zipursky, 2020, Tan et al.,  
488 2015, Yamagata and Sanes, 2008, Yamagata and Sanes, 2012), we speculate that

489 adhesion molecules involved in synaptogenesis and neurite placement within layered  
490 neuropils might similarly act to coordinate differential adhesion and synaptogenesis onto  
491 target neurons.

492 Zippering mechanisms via affinity-mediated adhesion might help instruct  
493 neighborhood coherence while preserving ‘fluid’, or transient interactions among  
494 neurites within neuropil structures. Analysis of connectome data and examination of  
495 neuronal adjacencies within the nerve ring neuropil revealed that contact profiles for  
496 single neurons vary across animals indicative of fluid or transient interactions during  
497 development (Moyle et al., 2021). Yet neuropils have a stereotyped and layered  
498 architecture encompassing specific circuits. We hypothesize that dynamic expression of  
499 adhesion molecules help preserve tissue organization in tangled neuropils via the  
500 creation of affinity relationships of relative strengths. These relationships, in the context  
501 of outgrowth decisions of single neurites, would contribute to the sorting of neurites onto  
502 specific strata. We propose that sorting of neurite into strata would happen through  
503 biophysical interactions not unlike those reported for morphogenic events in early  
504 embryos and occurring via differential adhesion (Steinberg, 1962, Foty and Steinberg,  
505 Steinberg and Gilbert, 2004). Spatiotemporally restricted expression of CAMs in layers,  
506 as we observe for SYG-1 and has been observed for other CAMs in layered neuropils  
507 (Sanes and Zipursky, 2010, Sanes and Zipursky, 2020, Tan et al., 2015, Yamagata and  
508 Sanes, 2008, Yamagata and Sanes, 2012) would then result in dynamic affinity-  
509 mediated relationships that preserve neighborhood coherence in the context of ‘fluid’, or  
510 transient interactions among neurites within the neuropil structures.

511

512 **Methods**

513 **Materials Availability**

514 Plasmids and worm lines generated in this study are available upon request (see  
515 Supplementary Tables 2 and 3 for details).

516 **Data Availability**

517 The original/source data generated or analyzed during this study are available from the  
518 corresponding author upon request.

519

520 **Code Availability**

521 From previously determined adjacencies (Brittin et al., 2018, Brittin et al., 2021, Witvliet  
522 et al., 2020), cosine similarities were calculated in Excel, using the formula described in  
523 Methods. For computing binary connection matrices for centrality analysis (detailed in  
524 Methods below). we used the function “betweenness\_bin.m” in the Brain Connectivity  
525 Toolbox (Rubinov and Sporns) of MATLAB2020.

526

527 **Maintenance of *C. elegans* strains**

528 *C. elegans* strains were raised at 20°C using OP50 *Escherichia coli* seeded on  
529 NGM plates. N2 Bristol is the wild-type reference strain used. Plasmids and transgenic  
530 strains generated and used in this study (Supplementary Tables 2 and 3) are available  
531 upon request.

532

## 533 **Molecular biology and generation of transgenic lines**

534 We used Gibson Assembly (New England Biolabs) or the Gateway system  
535 (Invitrogen) to make plasmids (Supplementary Table 3) used for generating transgenic  
536 *C. elegans* strains (Supplementary Table 2). Detailed cloning information or plasmid  
537 maps will be provided upon request. Transgenic strains were generated via  
538 microinjection with the construct of interest at 2-100 ng/uL by standard techniques  
539 (Mello and Fire). Co-injection markers *unc-122p*: GFP or *unc-122p*: RFP were used.

540 We generated the *syg-1* transcriptional reporter (Fig. 5, Supplementary Fig. 5)  
541 by fusing membrane-targeted PH:GFP to a 3.5 kb *syg-1* promoter region as described  
542 (Schwarz et al., 2009). The translational reporter was generated by fusing a GFP-  
543 tagged *syg-1b* cDNA using the same promoter (Fig. 5). For cell-specific SYG-1  
544 expression, full length SYG-1, SYG-1 ecto (extracellular +TM domain - amino acids 1-  
545 574, (Chao and Shen, 2008)) or SYG-1 endo (signal peptide+TM domain+cytoplasmic  
546 domain – amino acids 1-31+526-574) were used.

547 For cell-specific labeling and expression in larvae, we used an *inx-1* promoter for  
548 AIB (Altun et al., 2008), a *ceh-36* promoter for AWC and ASE (Kim et al., 2010) and *tdc-*  
549 *1*, *gcy-13* and *cex-1* promoters for RIM (Greer et al., 2008, Piggott et al., 2011).

550

## 551 **SNP mapping and Whole-Genome Sequencing**

552 We performed a visual forward genetic screen in an integrated wild type  
553 transgenic strain (*olals67*) with AIB labeled with cytoplasmic mCherry and AIB  
554 presynaptic sites labeled with GFP:RAB-3. Ethyl methanesulfonate (EMS) mutagenesis  
555 was performed and animals were screened for defects in placement of the AIB neurite,



556 or presynaptic distribution. We screened for these same phenotypes in our reverse  
557 genetic screens as well, where we crossed the marker strain (*olals67*) to characterized  
558 mutant alleles. We screened F2 progeny on a Leica DM 5000 B compound microscope  
559 with an HCX PL APO 63x/1.40–0.60 oil objective.

560 Mutants from forward genetic screens were out-crossed six times to wild type  
561 (N2) animals and mapped via single-nucleotide polymorphism (SNP) (Davis et al.,  
562 2005) and whole-genome sequencing as previously described (Sarin et al., 2008). We  
563 analyzed the results using the Galaxy platform ([https://galaxyproject.org/news/cloud-](https://galaxyproject.org/news/cloud-map/)  
564 [map/](https://galaxyproject.org/news/cloud-map/), EMS variant density mapping workflow (Minevich et al., 2012).

565

#### 566 **Confocal imaging of *C. elegans* larvae and image processing**

567 We used an UltraView VoX spinning disc confocal microscope with a 60x CFI  
568 Plan Apo VC, NA 1.4, oil objective on a NikonTi-E stand (PerkinElmer) with a  
569 Hamamatsu C9100–50 camera. We imaged the following fluorescently tagged fusion  
570 proteins, eGFP, GFP, PH:GFP (membrane-tethered), RFP, mTagBFP1, mCherry,  
571 mCherry:PH, mScarlet, mScarlet:PH at 405, 488 or 561 nm excitation wavelength. We  
572 anesthetized larval stage 4 animals (unless otherwise mentioned) at room temperature  
573 in 10mM levamisole (Sigma) and mounted them on glass slides for imaging. For Fig. 5  
574 and the RIM neuron ablation images in Supplementary Fig. 7, larval stage 3 animals  
575 were imaged.

576 We used the Volocity image acquisition software (Improvision by Perkin Elmer)  
577 and processed our images using Fiji (Schindelin et al., 2012). Image processing

578 included maximum intensity projection, 3D projection, rotation, cropping,  
579 brightness/contrast, line segment straightening, and pseudo coloring. All quantifications  
580 from confocal images were conducted on maximal projections of the raw data.  
581 Pseudocoloring of AIBL and AIBR was performed in Fiji. To achieve this, pixels  
582 corresponding to the neurite of either AIBL/R were identified and the rest of the pixels in  
583 the image were cleared. This was done for both neurons of the pair and the resulting  
584 images were merged. For quantifications from confocal images, n= number of neurons  
585 quantified, unless otherwise mentioned.

586

### 587 **Embryo labeling, imaging and image processing**

588 For labeling of neurites in embryos, we used membrane tethered PH:GFP or  
589 mScarlet:PH. A subtractive labeling strategy was employed for AIB embryo labeling  
590 (Supplementary Fig. 3A-C) (Armenti et al., 2014, Moyle et al., 2021). Briefly, we  
591 generated a strain containing *unc-42p::ZF1::PH::GFP* and *lim-4p::SL2::ZIF-1*, which  
592 degraded GFP in the sublateral neurons, leaving GFP expression only in the AIB and/or  
593 ASH neurons. Onset of twitching was used as a reference to time developmental  
594 events. Embryonic twitching is stereotyped and starts at 430 minutes post fertilization  
595 (m.p.f) for our imaging conditions.

596 Embryonic imaging was performed via dual-view inverted light sheet microscopy  
597 (diSPIM) (Kumar et al., 2014, Wu et al., 2013) and a combined triple-view line scanning  
598 confocal/DL for denoising (Wu et al., in prep, also described below) described below.  
599 Images were processed and quantifications from images were done using CytoSHOW,

600 an open source image analysis software. CytoSHOW can be downloaded from  
601 <http://www.cytoshow.org/> as described (Duncan et al., 2019).

602

### 603 **Triple-view line-scanning confocal/DL**

604 We developed a triple-view microscope that can sequentially capture three  
605 specimen views, each acquired using line-scanning confocal microscopy (Wu et al., in  
606 prep). Multiview registration and deconvolution can be used to fuse the 3 views (Wu et  
607 al., 2016), improving spatial resolution. Much of the hardware for this system is similar  
608 to the previously published triple-view system (Wu et al., 2016), i.e., we used two 0.8  
609 NA water immersion objectives for the top views and a 1.2 NA water immersion lens  
610 placed beneath the coverslip for the bottom view. To increase acquisition speed and  
611 reduce photobleaching, we applied a deep-learning framework (Weigert et al., 2018) to  
612 predict the triple-view result when only using data acquired from the bottom view. The  
613 training datasets were established from 50 embryos (anesthetized with 0.3% sodium  
614 azide) in the post-twitching stage, in which the ground truth data were the deconvolved  
615 triple view confocal images, and the input data were the raw single view confocal  
616 images. These approaches resulted in improved resolution (270nm X 250 nm X  
617 335nm).

618

### 619 **Cell lineaging**

620 Cell lineaging was performed using StarryNite/AceTree (Bao et al., 2006, Boyle  
621 et al., 2006, Murray et al., 2006). Light sheet microscopy and lineaging approaches  
622 were integrated to uncover cell identities in pre-twitching embryos (Duncan et al., 2019).

623 Lineaging information for promoters is available at <http://promoters.wormguides.org>.  
624 Our integrated imaging and lineaging approaches enabled us to identify a promoter  
625 region of *inx-19* which is expressed in the RIM neurons prior to RIM neurite outgrowth  
626 (~370 m.p.f.) and in additional neurons in later embryonic stages. The *inx-19p* was one  
627 of the promoters used for embryonic ablation of the RIM neurons (described in the next  
628 section).  
629 In addition, our integrated imaging and lineaging approach also enabled us to identify  
630 two promoters with expression primarily in neurons located at the AIB posterior  
631 neighborhood (*nphp-4p* and *mgl-1bp*). 4/4 neuron classes that were identified to have  
632 *nphp4p* expression are in the AIB posterior neighborhood (ADL/R, ASGL/R, ASHL/R,  
633 ASJL/R) and 2/3 neuron classes that were identified to have *mgl-1bp* expression are in  
634 the AIB posterior neighborhood (AIAL/R, ADFR) (<http://promoters.wormguides.org>). We  
635 used these promoters to drive ectopic expression of a *syg-1* cDNA specifically in the  
636 posterior neighborhood.

637

### 638 **Caspase-mediated ablation of RIM neurons**

639 The RIM neurons were ablated using a split-caspase ablation system (Chelur  
640 and Chalfie, 2007). We generated one set of transgenic strains with co-expression of  
641 the p12 and p17 subunit of human Caspase-3, both expressed under *inx-19p* (termed  
642 ablation strategy 1), and another set of ablation strains with co-expression of the p12  
643 subunit expressed under *inx-19p* and p17 under *tdc-1p* (termed ablation strategy 2)  
644 (Supplementary Fig. 7). L3 larvae from the RIM-ablated populations were imaged on the

645 spinning-disk confocal microscope (described in the '**Confocal imaging of C. elegans**  
646 **larvae and image processing**' section).

647

## 648 **Rendering of neurites and contacts in the EM datasets**

649 From available EM datasets (Brittin et al., 2018, Cook et al., 2019, White et al.,  
650 1986, Witvliet et al., 2020) we rendered the segmentations of neuron boundaries in 2D  
651 using TrakEM2 in Fiji. TrakEM2 segmentations were volumetrically rendered by using  
652 the 3D viewer plugin in Fiji (downloaded from <https://imagej.net/Fiji#Downloads>) and  
653 saved as object files (.obj), or by using the 3D viewer in CytoSHOW.

654 To generate 3D mappings of inter-neurite membrane contact, the entire  
655 collection of 76,046 segmented neuron membrane boundaries from the JSH TEM  
656 datasets (Brittin et al., 2018, White et al., 1986) were imported from TrakEM2 format  
657 into CytoSHOW as 2D cell-name-labelled and uniquely color-coded regions of interest  
658 (ROIs). To test for membrane juxtaposition, we dilated each individual cell-specific ROI  
659 by 9 pixels (40.5 nm) and identified for overlap by comparing with neighboring undilated  
660 ROIs from the same EM slice. A collection of 289,012 regions of overlap were recorded  
661 as new ROIs, each bearing the color code of the dilated ROI and labeled with both cell-  
662 names from the pair of the overlapped ROIs. These "contact patch" ROIs were then  
663 grouped by cell-pair-name and rendered via a marching cubes algorithm to yield 3D  
664 isosurfaces saved in .obj files. Each of the 8852 rendered .obj files represents all  
665 patches of close adjacency between a given pair of neurons, color-coded and labeled  
666 by cell-pair name. Selected .obj files were co-displayed in a CytoSHOW3D viewer  
667 window to produce views presented in Fig. 1, Supplementary Fig. 1 and 2.

668

## 669 **Schematic representation of larval *C. elegans***

670 The schematic representations of larval *C. elegans* in Fig. 1 and Supplementary Fig. 6  
671 were made using the 3D worm model in OpenWorm (<http://openworm.org> - 3D Model  
672 by Christian Grove, WormBase, CalTech).

673

## 674 **Quantification and statistical analysis**

675

### 676 **Cosine similarity analysis for comparing AIB contacts across connectomes**

677 We performed cosine similarity analysis (Han et al., 2012) on AIB contacts in  
678 available connectome datasets (Brittin et al., 2018, White et al., 1986, Witvliet et al.,  
679 2020). For each available adjacency dataset (Brittin et al., 2021, Moyle et al., 2021,  
680 Witvliet et al., 2020), we extracted vectors comprising of the weights of AIB contacts  
681 with neurons common to all the datasets. We then performed cosine similarity analysis  
682 on these vectors using the formula:

$$683 \frac{\sum_{i=1}^n A_i B_i}{\sqrt{\sum_{i=1}^n A_i^2} \sqrt{\sum_{i=1}^n B_i^2}}$$

684 where A and B are the two vectors under consideration with the symbol “i” denoting the  
685 i-th entry of each vector. The similarity values were plotted as a heat map for AIBL and  
686 AIBR using Prism. For the datasets L1\_0hr, L1\_5hr, L1\_8hr, L2\_23hr, L3\_27hr, L4\_JSH  
687 and Adult\_N2U, only the neuron-neuron contacts in the EM sections corresponding to  
688 the nerve ring were used (as opposed to the whole connectome).

689

## 690 **Betweenness centrality analysis**

691 We analyzed betweenness centrality for two of the available connectomes of  
692 different developmental stages (L1 and adult) (Witvliet et al., 2020). By treating  
693 individual components (mostly neurons) of a connectome as the vertices of a graph, we  
694 use the following definition of Betweenness Centrality for a vertex  $v$ ,

$$695 \quad BC(v) = \sum_{s,t:s \neq t \neq v} \frac{\lambda_{st}(v)}{\lambda_{st}}$$

696 Here  $\lambda_{st}(v)$  denotes the number of shortest paths between the vertices  $s$  and  $t$ , that  
697 include vertex  $v$ , whereas  $\lambda_{st}$  denotes the total number of shortest paths between the  
698 vertices  $s$  and  $t$ . We finally divide  $BC(v)$  by  $(N - 1)(N - 2)/2$  to normalize it to lie  
699 between 0 and 1. For our implementation we use the Brain Connectivity Toolbox  
700 (Rubinov and Sporns) of MATLAB2020, in particular, the function “betweenness\_bin.m”  
701 in which we input the binary connectivity matrix (threshold = 0) (Fornito et al., 2016)  
702 corresponding to the L1 and adult connectomes (Witvliet et al., 2020). We made a  
703 Prism box plot (10 to 90 percentile) of betweenness centrality values of all components  
704 in each of the two connectomes and highlighted the betweenness centrality values for  
705 AIBL and AIBR.

706

## 707 **Representation of AIB from confocal images**

708           Since we observed that the proximal and distal neurites of AIBL and AIBR  
709 completely align and overlap (Supplementary Fig. 1) in confocal image stacks where the  
710 worms are oriented on their side, for representation purposes we have used the upper  
711 50% of z-slices in confocal image stacks to make maximum intensity projections. This  
712 shows the proximal neurite of AIBL in the context of the distal of AIBR (which has the  
713 same anterior-posterior position as the distal neurite of AIBL) (Supplementary Fig. 1), or  
714 vice versa.

715

## 716 **Quantification of penetrance of AIB neurite placement defects and gain-of-** 717 **function phenotypes**

718           The penetrance of defects in AIB neurite placement in the anterior neighborhood  
719 in mutant (or ablation) strains was determined by visualizing the AIB neurite and scoring  
720 animals with normal or defective anterior neighborhood placement under the Leica  
721 compound microscope described. Animals in which the entire distal neurite was placed  
722 at a uniform distance from the proximal neurite, for both AIBL and AIBR, were scored as  
723 having normal AIB distal neurite placement.

724           The penetrance of the gain-of-function effects in ectopic SYG-1 expression  
725 strains was determined by scoring the percentage of animals showing ectopic AIB distal  
726 neurite placement in the posterior neighborhood. Animals with part (or whole) of the AIB  
727 distal neurite overlapping with the posterior neighborhood were considered as having  
728 ectopic AIB placement.

729



730 **Quantification of minimum perpendicular distance between neurites**

731 Minimum perpendicular distances between neurites were measured by creating a  
732 straight line selection (on Fiji) between the neurites (perpendicular to one of the  
733 neurites) in the region where the gap between them is estimated to be the smallest. The  
734 measurements were done on maximum intensity projections of raw confocal image  
735 stacks where the worms are oriented on their side (z-stacks acquired along left-right  
736 axis of the worm, producing a lateral view of the neurons).

737

738 **Quantification of percent detachment between neurites**

739 The percent detachment for defasciculated neurites (AIB and RIM) is calculated  
740 by the formula  $\% \text{ detachment} = \text{detached length } (L_d) \times 100 / \text{total length } (L_t)$  (also shown  
741 in Fig. 4M).  $L_d$  is calculated by making a freehand line selection along the detached  
742 region of the RIM neurite and measuring its length and  $L_t$  is calculated by making a  
743 freehand selection along the RIM neurite for the entire length over which it contacts AIB,  
744 and measuring the length of the selection. All the measurements were performed on  
745 maximum intensity projections of confocal image stacks where the worms are oriented  
746 on their side (z-stacks acquired along left right axis of the worm, producing a lateral  
747 view of the neurons).

748

749 **Quantification of relative enrichment of *syg-1* reporter expression in the**  
750 **anterior neighborhood**

751           Relative (anterior) enrichment of *syg-1* reporter expression in embryos (Fig. 5S)  
752 is calculated using the formula, relative enrichment ( $syg-1p$ ) = mean anterior  
753 neighborhood intensity ( $I_a$ )/mean posterior neighborhood intensity ( $I_p$ ). These  
754 measurements were done in transgenic embryos co-expressing the AIB reporter and  
755 the *syg-1* transcriptional reporter. For calculation of  $I_p$ , a freehand line selection was  
756 made (using CytoSHOW, <http://www.cytoshow.org/>, (Duncan et al., 2019)) along the  
757 posterior band of *syg-1* expression and mean intensity along the selection was  
758 calculated. Same was done for calculation of  $I_a$ . The ratios of  $I_a$  and  $I_p$  were plotted as  
759 relative (anterior) enrichment values (Fig. 5S). These values were calculated from 3D  
760 projections of deconvolved diSPIM images acquired at intensities within dynamic range  
761 (not saturated) at timepoints during embryogenesis (485, 515 and 535 minutes post  
762 fertilization), when the AIB neurite grows and is placed into the posterior and anterior  
763 neighborhoods.  $I_a/I_p$  was calculated from the anterior and posterior *syg-1* bands on each  
764 side of the embryonic nerve ring per embryo (number of embryos = 4, number of  $I_a/I_p$   
765 values = 8).

766

### 767 **Quantification of the dorsal midline shift (chiasm) length of AIB**

768           The dorsal midline shift (chiasm) lengths of AIB and AVE were calculated by  
769 making 3D maximum intensity projections of confocal z-stacks and orienting the neuron  
770 pair to a dorsal-ventral view. A straight line selection is made along the posterior-  
771 anterior shift of each neuron, and each arm of the “X” of the chiasm was measured  
772 (using Fiji).

773

## 774 **Quantification of distal neurite length of AIB**

775         The length of the distal neurite of AIB was measured by drawing a freehand line  
776 along the neurite segment occupying the distal neighborhood (including the chiasm) in  
777 maximum intensity projections of confocal image stacks where the worms are oriented  
778 on their side (z-stacks acquired along left-right axis of the worm, producing a lateral  
779 view of the neurons).

780

## 781 **Quantification of positions and velocities of the AIB neurite during** 782 **embryogenesis**

783 The positions of the AIB neurite in the anterior and posterior neighborhoods in Fig. 3C  
784 are calculated from deconvolved maximum intensity projections of diSPIM images  
785 where the neurons are oriented in an axial view. These positions are determined by  
786 measuring the lengths along the AIB neurite from the unzipping/zippering forks to the  
787 dorsal midline. The distance of the zippering fork from the midline is subtracted from the  
788 total length of the neurite at the start of zippering, to obtain the length of the AIB neurite  
789 that has already zippered. The fraction of the length of the AIB neurite that has zippered  
790 to the initial length of the relocating AIB distal neurite, multiplied by 100, yields the  
791 percentage of the AIB neurite that has zippered at each timepoint. The reported values  
792 (in Fig. 5S) of the percentages of the AIB neurite that has zippered are averages across  
793 the three independent embryo datasets (used for the Fig. 3 plots). Embryos in which the  
794 AIB and RIM neurons were specifically labeled by the subtractive labeling strategy were

795 used for the analysis. Reported measurements represent AIB neurites which were  
796 visible through the imaging window. Zippering velocity (Fig. 3D) at any timepoint (t1) is  
797 defined as the difference between positions of the AIB neurite at that timepoint (t1) and  
798 the next timepoint (t2) (for which position was measured), divided by the time interval  
799 (t2-t1). These measurements are performed with CytoSHOW. To pseudocolor the  
800 neurites for representation, we used the same steps described in ‘**Confocal imaging of**  
801 ***C. elegans* larvae and image processing.**’

802

### 803 **Quantification of the angle of exit of the developing AIB distal neurite with the** 804 **ventral turn of the nerve ring in the posterior neighborhood**

805 The angle of exit ( $\alpha$ ) of the developing AIB distal neurite is measured as the  
806 angle between straight line tangents drawn along the separating distal segment of AIBL  
807 and the proximal neurite of AIBR and vice versa. These measurements are performed  
808 on deconvolved maximum intensity projections of diSPIM images where the neurons  
809 are oriented in an axial view. The angle of ventral turn of the nerve ring ( $\beta$ ) is measured  
810 as the angle between straight line tangents drawn along segments of the nerve ring on  
811 either side of the ventral bend of the nerve ring in the posterior neighborhood (see  
812 Supplementary Fig. 3G,H).  $\beta$  is measured from images of embryos with proximal  
813 neighborhood labeled with *nphp-4* promoter (see Results and  
814 <http://promoters.wormguides.org>). All measurements are performed using CytoSHOW.

815

### 816 **Imaging and representation of synaptic protein RAB-3 in AIB in embryos**

817 Time-lapse imaging of presynaptic protein RAB-3 in AIB in embryos was  
818 performed using diSPIM (Wu et al., 2013). To visualize the distribution of RAB-3 along  
819 the neurite we straightened the distal neurite of each AIB neuron from maximum  
820 intensity projections where the AIB neurons are oriented in the axial view (Fig. 7).

821

### 822 **Quantification of nerve ring width from larval stage animals**

823 The nerve ring was visualized using a 5.6 kb promoter of *cnd-1* (Shah et al., 2017)  
824 driving membrane-targeted GFP (PH:GFP) in wildtype and *syg-1(ky652)* mutant  
825 animals. Measurements were done on confocal image stacks where the worms are  
826 oriented on their side (z-stacks acquired along left-right axis of the worm, producing a  
827 lateral view of the neurons). On each side of the worm a straight line selection along the  
828 anterior-posterior axis from one edge of the labeled nerve ring to the other was defined  
829 as the nerve ring width.

830

### 831 **Quantification of length of the dorsal midline shift (chiasm) from EM images**

832 From a segmented EM dataset of the L4 larva JSH (Brittin et al., 2018, White et  
833 al., 1986), we calculated the number of z-slices containing segmented regions of the  
834 anterior-posterior shift (that forms the chiasm) of AIBL. We multiplied this number with  
835 the z-spacing of the dataset (60 nm) to obtain the anterior-posterior distance that the  
836 AIBL shift spans ( $d_z$ ). We then calculated the x-y distance between the segmented  
837 regions of the AIBL shift in the topmost and bottommost z-slice( $d_{x-y}$ ). We calculate the  
838 length of the shift in 3D ( $l$ ) using the formula

839 
$$l = \sqrt{d_z^2 + d_{x-y}^2}$$

840 The same measurements were repeated for the length of the dorsal midline shift of  
841 AIBR.

842

### 843 **Statistical analyses**

844 Statistical analyses were conducted with PRISM 7 software. For each case, the  
845 chosen statistical test is described in the figure legend and “n” values are reported.  
846 Briefly, for continuous data, comparisons between two groups were determined by  
847 unpaired two-tailed t-test and comparisons within multiple groups were performed by  
848 ordinary one-way ANOVA. Error bars were reported as standard error of the mean  
849 (SEM). For categorical data, groups were compared with two-sided Fisher’s exact test.  
850 The range of p-values for significant differences are reported in the figure legend. The  
851 Cohen’s d statistic was determined for comparisons between continuous datasets with  
852 statistically significant differences, to obtain estimates of effect sizes.

853

### 854 **Acknowledgements**

855 We thank Kang Shen, Harald Hutter and John Murray for providing strains and  
856 constructs. We thank Scott Emmons, Steve Cook, and Chris Brittin, and Mei Zhen and  
857 Daniel Witvliet for sharing their segmented EM data and adjacencies. We thank Thierry  
858 Emonet and members of the Colón-Ramos lab for help, advice and insightful comments  
859 during manuscript preparation. We thank Sarah Se-Hyun Jho and Kenya Collins for their

860 contributions to the project. We thank the Caenorhabditis Genetics Center (funded by NIH  
861 Office of Research Infrastructure Programs P40 OD010440) for *C. elegans* strains. We  
862 thank the Research Center for Minority Institutions program, the Marine Biological  
863 Laboratories (MBL), and the Instituto de Neurobiología de la Universidad de Puerto Rico for  
864 providing meeting and brainstorming platforms. H.S. and D.A.C.-R. acknowledge the  
865 Whitman and Fellows program at MBL for providing funding and space for discussions  
866 valuable to this work. Research in the D.A.C.-R., W.A.M., and Z. B. labs were supported by  
867 NIH grant No. R24-OD016474. M.W.M. was supported by NIH by F32-NS098616.  
868 Research in H.S. lab was further supported by the intramural research program of the  
869 National Institute of Biomedical Imaging and Bioengineering (NIBIB), NIH. Research in Z.B.  
870 lab was further supported by an NIH center grant to MSKCC (P30CA008748). Research in  
871 the D.A.C.-R. lab was further supported by NIH R01NS076558, DP1NS111778 and by an  
872 HHMI Scholar Award.

873

#### 874 **Author contributions**

875 T.S. and D.A.C.-R. designed the experiments. T.S. performed the experiments and data  
876 analysis. X.H., Y.W. and H.S. designed and performed the triple-view confocal imaging  
877 and deep learning analysis. T.S., N.L.K., M.W.M., L.H.D., and N.V.-M. generated  
878 reagents and provided resources. T.S., N.L.K., M.W.M., L.S., Y.W., A.S., Z.B., H.S. and  
879 W.A.M developed, and designed methodologies used in the study. S.E.E. analyzed and  
880 interpreted embryonic transcriptomics data (Packer et al., 2019). L.F. and A.S.  
881 contributed lineaging data and expertise. T.S. and D.A.C.-R. prepared the manuscript  
882 with input from the other authors. Z.B., W.A.M., H.S., D.A.C.-R. supervised the project.

883

## 884 **Declaration of interests**

885 The authors declare no competing interests.

886

## 887 **Figure Legends**

888

889 **Fig. 1: AIB single neurite is placed along two distinct neighborhoods in the nerve**  
890 **ring**

891

892 **A**, Schematic of an adult/larval *C. elegans* showing an AIB neuron (cyan) and its  
893 posterior (orange) and anterior (magenta) neighborhoods in the head. The AIB neurite  
894 has a proximal neurite segment (orange arrow), a posterior-anterior shift at the dorsal  
895 midline (dashed line) and a distal neurite segment (magenta arrow; on the other side of  
896 the worm, behind the pharynx, which is in gray). The neon-colored outline represents  
897 the nerve ring neuropil. The terms ‘proximal’ or ‘distal’ neurite segments refer to the  
898 relationship of the neurite segment to the AIB cell body. The neighborhoods in which the  
899 ‘proximal’ and ‘distal’ neurite segments are positioned are referred to as the ‘posterior’  
900 or ‘anterior’ neighborhoods, respectively, because of their position along the anterior-  
901 posterior axis of the worm. Note that this schematic only shows one neuron of the AIB  
902 pair. Cell body is marked with an asterisk.

903 **B**, Magnified schematic of AIB and its neighborhoods in **A**

904 **C**, Representative confocal image showing the lateral view of an AIB neuron labeled  
905 with cytoplasmic mCherry (cyan).



906 **D**, Representative confocal image showing an AIB neuron labeled with cytoplasmic  
907 mCherry (cyan); and RIM motor neuron of the anterior neighborhood labeled with  
908 cytoplasmic GFP (magenta) in lateral view. Note the colocalization of the AIB distal  
909 neurite (but not the proximal neurite) with the anterior neighborhood marker RIM  
910 (compare with **E**).

911 **E**, As **D**, but with AIB (cyan) and AWC and ASE sensory neurons of the posterior  
912 neighborhood (orange). Note the colocalization of the AIB proximal neurite (but not the  
913 distal neurite) with the posterior neighborhood markers AWC and ASE (compare with  
914 **D**).

915 **F-J**, Same as **A-E** but in axial view indicated by the arrow in **F**. Note shift in **H** (arrows),  
916 corresponding to AIB neurite shifting neighborhoods (compare **I** and **J**).

917 **K,L**, Volumetric reconstruction from the JSH electron microscopy connectome dataset  
918 (White et al., 1986) of AIBL (**K**), and AIBL overlaid on nerve ring strata (**L**), in lateral  
919 view, with S2 and S3 strata (named as in (Moyle et al., 2021)), containing anterior and  
920 posterior neighborhoods, respectively.

921 **M**, Volumetric reconstruction of AIBL and AIBR in axial view (from the JSH dataset  
922 (White et al., 1986)). Note the shift in neighborhoods by AIBL and AIBR, at the dorsal  
923 midline (dashed line), forms a chiasm.

924 **N**, Schematic of **M**, highlighting the AIB neighborhoods for context and the dorsal  
925 midline with a dashed line.

926 Scale bar = 10  $\mu\text{m}$  for **A-J** and 3  $\mu\text{m}$  for **K-N**.

927

928 **Fig. 2: A retrograde zippering mechanism positions the AIB neurites in the**  
929 **anterior neighborhood during embryonic development**

930

931 **A**, Schematic of axial view of the AIB neuron pair: AIBL (cyan) and AIBR (yellow) in the  
932 context of the nerve ring (light neon) and the pharynx (grey), with posterior  
933 neighborhood labeled (orange) and the dashed line representing the dorsal midline  
934 where the AIB chiasm is present in adults (see Fig. 1). Dotted box represents region in  
935 **B'-F'**, and dotted box in **G**.

936 **B,F**, Time-lapse showing initial placement of AIBL and AIBR in the posterior  
937 neighborhood and their subsequent separation from this neighborhood. Images are  
938 deconvolved diSPIM maximum intensity projections obtained from developing embryos.  
939 Neurons were individually pseudocolored to distinguish them (see Methods). The dorsal  
940 half of the nerve ring (dotted box in **A**) are magnified in **B'-F'**. **B''-F''** are schematic  
941 diagrams representing the images in **B-F**. Dashed vertical lines represent the dorsal  
942 midline. Note in (**B, B', B''**), the AIBL and AIBR neurites approaching the dorsal midline  
943 in the posterior neighborhood. In (**C, C', C''**), AIBL and AIBR have met at the dorsal  
944 midline and continue growing along each other, past the midline. The latter part of the  
945 neurite, past the midline, becomes the future distal neurite. (**D, D', D''**) shows the tip of  
946 the AIBL future distal neurite moving away from the posterior neighborhood and its  
947 counterpart, AIBR. The arrowhead indicates the point of separation of the AIBL distal  
948 neurite and the AIBR proximal neurite. (**E, E', E''**) shows further separation of the two  
949 neurites and by (**F, F', F''**), they have completely separated. The arrowheads in (**E, E',**  
950 **E''**) and (**F, F', F''**) also indicate the junction between the separating AIBL distal neurite

951 and the AIBR proximal neurite. A similar sequence of events is visualized at higher  
952 spatial resolution in Supplementary Fig. 3 using triple-view line scanning confocal  
953 microscopy.

954 **G, G'**, Confocal micrograph of a postembryonic L4 animal (axial view) showing the  
955 relationship between AIBL and AIBR. The region in the box represents the dorsal part of  
956 the nerve ring, magnified in **G'**.

957 **H**, Axial view schematic of one AIB neuron (cyan) in the context of the anterior  
958 neighborhood marker, the RIM neuron (magenta), the nerve ring (light neon) and the  
959 pharynx (grey).

960 **I-K**, Time-lapse showing placement of the AIB neurite (cyan) relative to the anterior  
961 neighborhood (magenta). As in **B-F**, images are deconvolved diSPIM maximum  
962 intensity projections and the neurons were pseudocolored. The dorsal half of the nerve  
963 ring (dotted box in **H**) are magnified in **I'-K'**. Dashed line indicates dorsal midline (where  
964 the shift, or chiasm, in the adult is positioned, see Fig. 1). **I''-K''** are schematic diagrams  
965 representing the images in **I-K**.

966 Note in (**I, I', I''**), the tip of the AIB neurite encounters the RIM neurite in the anterior  
967 neighborhood (green arrowhead). In (**J, J', J''**), the AIB distal neurite has partially  
968 aligned along the RIM neurites. The green arrowhead now indicates point of initial  
969 encounter of the two neurites (same as in **I'**), and the red arrowhead indicates the  
970 retrograde zippering event bringing the AIB and RIM neurons together in the anterior  
971 neighborhood. In (**K, K', K''**) the two neurites have zippered up to the dorsal midline.  
972 Arrow in **J'** indicates direction of zippering.

973 **L**, Confocal micrograph of a postembryonic L4 animal in axial view showing the final  
974 position of AIB with respect to the anterior neighborhood. The same image as Fig. 11  
975 was used here for reference. The region in the dotted box represents dorsal part of the  
976 nerve ring, magnified in (**L'**).

977 **M**, Schematic highlights the steps by which the AIB distal neurite is repositioned to a  
978 new neighborhood – (i) exit from the posterior neighborhood and (ii) retrograde  
979 zippering onto the anterior neighborhood with intermediate partially zippered states and  
980 completely zippered states.

981 Scale bar = 10  $\mu\text{m}$  for **B-G** and **I-L**.

982 Scale bar = 2  $\mu\text{m}$  for **B'-G'** and **I'-L'**

983 Times are in m.p.f. (minutes post fertilization).

984

985 **Fig. 3: Biophysical modeling of AIB developmental dynamics is consistent with**  
986 **differential adhesion leading to retrograde zippering**

987

988 **A**, Axial view schematic of a single AIB neuron during transition of its neurite between  
989 the posterior (orange) and anterior (magenta) neighborhoods.

990 **B,B'** Magnified schematic of dotted inset in (**A**) showing the AIB neurite (cyan) during its  
991 transition from the posterior to the anterior neighborhood. The lengths of the neurite  
992 positioned in the posterior and anterior neighborhoods are denoted by  $L_p$  and  $L_a$ ,  
993 respectively. The velocity with which the AIB neurite zippers onto the anterior  
994 neighborhood is denoted by  $v_{zip}$ , and the velocity with which it unzippers from the  
995 posterior neighborhood is denoted by  $v_{unzip}$ . At the junction between the neurite and the

996 two neighborhoods, i.e., at the zippering and unzippering forks, tension and adhesion  
997 forces act on the neurite (see **B'** and Supplementary Note 1). **B'**, Schematic of AIB  
998 neurite zippering to the anterior neighborhood. Adhesion  $S_{\text{anterior}}$  acts in the direction of  
999 zippering (and therefore in the direction of the zippering velocity  $v_{\text{zip}}$ ), and favors  
1000 zippering. Tension  $T_{\text{anterior}}$  acts in the opposite direction, disfavoring zippering.

1001 **C**, Plot of position vs. time of the AIB neurite in both neighborhoods in synchronized  
1002 embryos at the indicated timepoints on the x-axis ( $\pm 5$  mins). Plot shows mean of  $L_p$   
1003 ( $n=4$ ) and  $L_a$  ( $n=3$ ) values at different timepoints. Note zippering from the anterior  
1004 neighborhood and unzippering from the posterior neighborhood take place in the same  
1005 time window and are inversely related (between 500-545 m.p.f.). Quantifications were  
1006 done from 3 embryos for each of  $L_a$  and  $L_p$ .

1007 **D**, Plot of zippering velocities vs time ( $n=3$ ) for the indicated timepoints on the x-axis ( $\pm 5$   
1008 mins). Note a tenfold increase in velocity mid-way through zippering (530 m.p.f.)  
1009 m.p.f. = minutes post fertilization. Error bars represent standard error of the mean  
1010 (S.E.M.), The three embryo datasets used for measuring  $L_a$  values in (**C**) were used to  
1011 calculate zippering velocities.

1012 For **C** and **D**,  $n$  represents the number of AIB neurites quantified.

1013

1014 **Fig. 4: SYG-1 and SYG-2 are required for precise placement of the AIB neurite in**  
1015 **the anterior neighborhood**

1016

1017 **A-D**, Representative confocal images of AIB (**A**) and RIM neurons (**B**) which mark the  
1018 anterior neighborhood, in a wild type animal. (**C**) is a merge of **A** and **B**. The dashed

1019 box represents the region of contact of AIB with the anterior neighborhood, magnified in  
1020 **(D)**. The AIB distal neurite colocalizes extensively with the anterior neighborhood in wild  
1021 type animals (Arrow in **D** and Supplementary Fig. 2A,B). Cell bodies are marked with an  
1022 asterisk.

1023 **E-L**, As **A-D** but in the *syg-1(ky652)* (**E-H**) and *syg-2(ky671)* (**I-L**) mutant background.  
1024 Note the gaps between the AIB distal neurite and the RIM neurites (**H,L**, arrows),  
1025 indicating loss of contact between the AIB and the anterior neighborhood in these  
1026 mutants.

1027 **M**, Schematic and scatter plot of quantifications of the loss of contacts between AIB and  
1028 the anterior neighborhood for wild type (n=41), *syg-1(ky652)* mutant (n=39) and *syg-*  
1029 *2(ky671)* animals (n=49). 'n' represents the number of AIB neurites quantified from 21,  
1030 20 and 25 animals respectively. The extent of detachment of the AIB distal neurite, and  
1031 hence its deviation from the RIM neighborhood, was quantified using the indicated  
1032 formula (see also Methods). Error bars indicate standard error of the mean (S.E.M.).  
1033 \*\*\*\*p<0.0001, \*\*p=0.0095 (one-way ANOVA with Dunnett's multiple comparisons test).  
1034 n represents the number of AIB neurites quantified. Estimated effect size, d = 1.110 for  
1035 WT vs. *syg-1(ky652)* and 0.775 for WT vs. *syg-2(ky671)*.

1036 **N**, Quantification of the penetrance of the AIB neurite placement defect as the  
1037 percentage of animals with normal AIB distal neurite placement in WT, *syg-1(ky652)*,  
1038 *syg-2(ky671)*, *syg-1(ky652);syg-2(ky671)* double mutant, *inx-1p:syg-2* rescue, *inx-*  
1039 *1p:syg-1* rescue and SYG-1 cosmid rescue. *inx-1p* is a cell-specific promoter driving  
1040 expression in AIB (Altun et al., 2008). The green and purple bars represent *syg-*  
1041 *1(ky652)* and *syg-2(ky671)* mutant backgrounds respectively. Numbers on bars

1042 represent number of animals examined. \*\*\*\* $p < 0.0001$  by two-sided Fisher's exact test  
1043 between WT and *syg-1(ky652)*, between WT and *syg-2(ky671)*, and between *syg-*  
1044 *1(ky652)* and SYG-1 cosmid rescue, and \*\* $p = 0.0055$  between *syg-2(ky671)* and *inx-*  
1045 *1p:syg-2* rescue. There is no significant difference (abbreviated by n.s.) in penetrance  
1046 between the *syg-1(ky652)* and *syg-1(ky652);syg-2(ky671)* ( $p = 0.6000$ ) populations and  
1047 between *syg-1(ky652)* and the *inx-1p:syg-1* animals ( $p = 0.3558$ ).

1048 Scale bar = 10  $\mu\text{m}$ , applies to **A-L**.

1049

1050 **Fig. 5: Increased local expression of SYG-1 in the anterior neighborhood**  
1051 **coincides with zippering of the AIB neurite onto this neighborhood**

1052

1053 **A-E**, Schematic (**A**) and representative confocal image of a wild type animal co-  
1054 expressing (**B**) a membrane-targeted *syg-1* transcriptional reporter (see Methods,  
1055 (Schwarz et al., 2009)) and (**C**) cytoplasmic AIB reporter. Merged image in (**D**). Since  
1056 the *syg-1* reporter is membrane-targeted, it labels cell body outlines and neurites (**B, D**).  
1057 The dashed box or inset in (**D**) represents the region of overlap between AIB and *syg-1-*  
1058 expressing neurites, magnified in (**E**). Note that the *syg-1* reporter shows two bands of  
1059 expression in the nerve ring (arrows in **B** and **D**) which coincide with the posterior and  
1060 anterior AIB neighborhoods (orange and magenta arrows). Note also that there is no  
1061 membrane outline corresponding to the AIB cell body (**B**, we drew a dashed silhouette  
1062 of the AIB cell body position as determined in **C**). Asterisk indicates cell body.

1063 **F-I**, As **B-E**, but with a translational SYG-1 reporter. Note the SYG-1 protein shows a  
1064 similar expression pattern.

1065 **J-N**, Schematic (**J**) and time-lapse images (**K-N**) of SYG-1 translational reporter  
1066 expression during embryogenesis (460-640 m.p.f.). Images are deconvolved diSPIM  
1067 maximum intensity projections. The dashed boxes represent the dorsal half of the nerve  
1068 ring and are magnified in **O-R**. **O'-R'** are schematic diagrams representing the images  
1069 in **O-R**. In (**K, O, O'**), SYG-1 expression is primarily visible in a single band containing  
1070 amphid neurites, and corresponding to the AIB posterior neighborhood. The magenta  
1071 dashed line and magenta arrows point to the anterior neighborhood and the orange  
1072 arrow, to the posterior neighborhood. By 535 m.p.f. (**L, P, P'**), SYG-1 expression is  
1073 visible in both the anterior and posterior neighborhoods. In subsequent timepoints (**M,**  
1074 **Q, Q', N, R, R'**), SYG-1 expression increases in the anterior neighborhood and  
1075 decreases in the posterior neighborhood, coincident with AIB developmental events that  
1076 enable its transition from the posterior to the anterior neighborhood (Fig. 2B-K). The  
1077 *syg-1* transcriptional reporter shows a similar expression pattern throughout  
1078 development (Supplementary Fig. 5).

1079 **S**, Plot showing relative enrichment of the *syg-1* transcriptional reporter in the anterior  
1080 neighborhood over time (magenta) overlaid with plot showing percentage of the  
1081 relocating AIB distal neurite that has zippered onto the anterior neighborhood (blue).  
1082 Relative enrichment in the anterior neighborhood is defined as the ratio of mean  
1083 intensity of the *syg-1* reporter in the band corresponding to the AIB anterior  
1084 neighborhood, as compared to that in the posterior neighborhood (see Methods). This  
1085 value is calculated starting at a timepoint when *syg-1* reporter expression becomes  
1086 visible in the anterior neighborhood, and averaged for 4 embryos. The relative  
1087 enrichment values plotted represent values calculated at the indicated developmental



1088 times on the x-axis ( $\pm 10$  mins). The reported values of “% AIB zippered” are averaged  
1089 across the three independent embryo datasets used for the plots in Fig. 3. Note similar  
1090 SYG-1 expression dynamics to zippering dynamics in AIB. Error bars represent  
1091 standard error of the mean (S.E.M.).

1092 Scale bar = 10  $\mu\text{m}$ , applies to **B-D**, **F-H** and **K-N**.

1093 Scale bar = 2  $\mu\text{m}$  in **E**, **I**, and **O-R**

1094 Times are in m.p.f. (minutes post fertilization).

1095

1096 **Fig. 6: Ectopic *syg-1* expression is sufficient to alter placement of the AIB distal**  
1097 **neurite**

1098

1099 **A**, Lateral view schematic of a wild type AIB neuron (cyan) in the context of the  
1100 posterior (orange) and anterior (magenta) neighborhoods, and the nerve ring (light  
1101 neon). Higher SYG-1 endogenous expression in the anterior neighborhood represented  
1102 by yellow arrowhead.

1103 **B-C**, Confocal image of a wild type animal with AIB (labeled with cytoplasmic mCherry,  
1104 in cyan) and the posterior neighborhood neurons AWC and ASE (labeled with  
1105 cytoplasmic GFP, in orange). The dashed box represents the region of contact between  
1106 AIB and the posterior neighborhood neurons, magnified in **(C)**.

1107 **D-F**, As **(A-C)**, but in the *syg-1(ky652)* lof (loss of function) mutant background. Note  
1108 that the distal neurite is positioned away from the posterior neighborhood, as in wild  
1109 type, although these animals display defects in fasciculation with the anterior  
1110 neighborhood (as shown in Fig. 4).

1111 **G-I**, As (**D-F**), but with ectopic overexpression of SYG-1 in the posterior neighborhood  
1112 neurons. In the schematic (**G**), expression of SYG-1 in the posterior neighborhood  
1113 (achieved here using *nphp-4p*, also see Supplementary Fig. 8A,B) is represented by a  
1114 yellow arrowhead (as in (**A**), but here in posterior neighborhood). Note that the AIB  
1115 distal neurite is now abnormally positioned in the posterior neighborhood in which SYG-  
1116 1 was ectopically expressed (**H, I**).

1117 **J**, Schematic (left) and scatter plot quantification (right) of minimum perpendicular  
1118 distances ( $d_{\min}$ , indicated by black double-headed arrow) between the AIB distal neurite  
1119 and posterior neighborhood neurons in WT (in black,  $n=17$ ), *syg-1(ky652)* (in green,  
1120  $n=18$ ), and two *syg-1(ky652)* populations with SYG-1 overexpressed in two different  
1121 sets of posterior neighborhood neurons via the use of *nphp-4p* and (in blue) *mgl-1bp* (in  
1122 red) ( $n=18$  and  $n=16$  respectively). \*\* $p=0.0056$  and  $0.0070$  respectively (one-way  
1123 ANOVA with Dunnett's multiple comparisons test). Effect size estimate,  $d = 1.075$  and  
1124  $1.140$  respectively. Error bars indicate standard error of the mean (S.E.M.).  $n$  represents  
1125 the number of AIB neurites quantified. Quantifications were done from 9 animals each  
1126 for WT, *syg-1(ky652)* and *nphp-4:syg-1; syg-1(ky652)* and 8 animals for *mgl-1b:syg-1;*  
1127 *syg-1(ky652)*.

1128 **K**, Quantification of penetrance of the ectopic AIB neurite placement represented as the  
1129 percentage of animals with the AIB distal neurite partially positioned in the posterior  
1130 neighborhood in the WT, *syg-1(ky652)* and posterior SYG-1 overexpression strains  
1131 (colors represent the same strains as in **J**). Numbers on bars represent number of  
1132 animals examined. \*\*\* $p=0.0002$  for *syg-1(ky652)* and *nphp-4p* expressed SYG-1 and

1133 \*\*\*\* $p < 0.0001$  for *syg-1(ky652)* and *mgl-1bp* expressed SYG-1 by two-sided Fisher's  
1134 exact test.

1135 Scale bar = 10  $\mu\text{m}$  in **B**, **E** and **H** and 1  $\mu\text{m}$  in **C**, **F**, and **I**. Cell body is marked with an  
1136 asterisk.

1137

1138 **Fig. 7: AIB neurite placement by retrograde zippering, and presynaptic assembly**  
1139 **are coordinated during development**

1140

1141 **A**, Axial view schematic of the AIB neurons (cyan) with presynaptic protein RAB-3  
1142 (yellow) puncta along the distal neurite. Arrowhead indicates the tip of the distal neurite  
1143 and arrow/dashed line indicate the dorsal midline.

1144 **B-E**, Time-lapse imaging of RAB-3 localization in AIB during embryogenesis. **B-E** are  
1145 merged diSPIM maximum intensity projections of AIB labeled with membrane-tagged  
1146 mCherry (cyan) and AIB presynaptic sites labeled with GFP:RAB-3 (yellow), at different  
1147 timepoints during embryogenesis. **B'-E'** represent the GFP:RAB-3 channel for images  
1148 in **B-E**. Note in (**B**, **B'**) and (**C**, **C'**) that the RAB-3 signal in the neurite is localized  
1149 exclusively near the neurite tip. As development progresses, there is more RAB-3 signal  
1150 throughout the neurite from the tip up to the midline (in (**D**, **D'**) and (**E**, **E'**)). Therefore,  
1151 RAB-3 becomes progressively enriched from the tip up to the midline during  
1152 development, and the timing for this process correlates, with a slight delay, with the  
1153 developmental timing of AIB zippering (Fig. 2I-K). Arrowhead and arrow, as in (**A**),  
1154 indicate the tip of the distal neurite and the region of the neurite near the dorsal midline  
1155 (dashed vertical line) respectively. Scale bar = 10  $\mu\text{m}$  applies (**B-E**) and (**B'-E'**).

1156 **F-I**, Straightened distal neurites from AIB (corresponding to the region in **(B-E)** which is  
1157 marked by the arrowhead (AIB tip) and arrows (dorsal midline). Note presynaptic  
1158 assembly, as imaged by RAB-3 accumulation, from the tip of the neurite towards the  
1159 midline of AIB, reminiscent of the zippering event (Fig. 2). Scale bar = 1  $\mu\text{m}$  applies **F-I**.  
1160 **J**, Schematic model showing progressive retrograde zippering leading to placement of  
1161 the AIB neurite along two different layers. This is accompanied by a switch in SYG-1  
1162 expression between layers, and synaptic protein localization in a retrograde order along  
1163 the neurite, resembling the order of zippering.

1164

1165

## 1166 **References**

1167

- 1168 ALTUN, Z. F., CHEN, B., WANG, Z. W. & HALL, D. H. 2008. High resolution map of  
1169 *Caenorhabditis elegans* gap junction proteins. *Developmental Dynamics*.  
1170 ARMENTI, S. T., LOHMER, L. L., SHERWOOD, D. R. & NANCE, J. 2014. Repurposing  
1171 an endogenous degradation system for rapid and targeted depletion of *C.*  
1172 *elegans* proteins. *Development (Cambridge)*.  
1173 AURELIO, O., BOULIN, T. & HOBERT, O. 2003. Identification of spatial and temporal  
1174 cues that regulate postembryonic expression of axon maintenance factors in the  
1175 *C. elegans* ventral nerve cord. *Development*, 130, 599-610.  
1176 BAIER, H. 2013. Synaptic laminae in the visual system: Molecular mechanisms forming  
1177 layers of perception.  
1178 BAO, S. & CAGAN, R. 2005. Preferential adhesion mediated by Hibris and Roughest  
1179 regulates morphogenesis and patterning in the *Drosophila* eye. *Dev Cell*, 8, 925-  
1180 35.  
1181 BAO, S., FISCHBACH, K. F., CORBIN, V. & CAGAN, R. L. 2010. Preferential adhesion  
1182 maintains separation of ommatidia in the *Drosophila* eye. *Dev Biol*, 344, 948-56.  
1183 BAO, Z., MURRAY, J. I., BOYLE, T., OOI, S. L., SANDEL, M. J. & WATERSTON, R. H.  
1184 2006. Automated cell lineage tracing in *Caenorhabditis elegans*. *Proceedings of*  
1185 *the National Academy of Sciences of the United States of America*.  
1186 BARRY, J., GU, Y. & GU, C. 2010. Polarized targeting of L1-CAM regulates axonal and  
1187 dendritic bundling in vitro. *European Journal of Neuroscience*.  
1188 BOYLE, T. J., BAO, Z., MURRAY, J. I., ARAYA, C. L. & WATERSTON, R. H. 2006.  
1189 AceTree: a tool for visual analysis of *Caenorhabditis elegans* embryogenesis.  
1190 *BMC Bioinformatics*, 7, 275.

- 1191 BRITTIN, C., COOK, S., HALL, D., EMMONS, S. & COHEN, N. 2018. Volumetric  
1192 reconstruction of main *Caenorhabditis elegans* neuropil at two different time  
1193 points. *bioRxiv*.
- 1194 BRITTIN, C. A., COOK, S. J., HALL, D. H., EMMONS, S. W. & COHEN, N. 2021. A  
1195 multi-scale brain map derived from whole-brain volumetric reconstructions.  
1196 *Nature*, 591, 105-110.
- 1197 CANTY, L., ZAROOUR, E., KASHKOOLY, L., FRANÇOIS, P. & FAGOTTO, F. 2017.  
1198 Sorting at embryonic boundaries requires high heterotypic interfacial tension.  
1199 *Nature Communications*, 8, 157.
- 1200 CHAO, D. L. & SHEN, K. 2008. Functional dissection of SYG-1 and SYG-2, cell  
1201 adhesion molecules required for selective synaptogenesis in *C. elegans*. *Mol Cell*  
1202 *Neurosci*, 39, 248-57.
- 1203 CHELUR, D. S. & CHALFIE, M. 2007. Targeted cell killing by reconstituted caspases.  
1204 *Proc Natl Acad Sci U S A*, 104, 2283-8.
- 1205 COOK, S. J., JARRELL, T. A., BRITTIN, C. A., WANG, Y., BLONIAZ, A. E.,  
1206 YAKOVLEV, M. A., NGUYEN, K. C. Q., TANG, L. T. H., BAYER, E. A., DUERR,  
1207 J. S., BÜLOW, H. E., HOBERT, O., HALL, D. H. & EMMONS, S. W. 2019.  
1208 Whole-animal connectomes of both *Caenorhabditis elegans* sexes. *Nature*.
- 1209 DAVIS, M. W., HAMMARLUND, M., HARRACH, T., HULLETT, P., OLSEN, S. &  
1210 JORGENSEN, E. M. 2005. Rapid single nucleotide polymorphism mapping in *C.*  
1211 *elegans*. *BMC Genomics*.
- 1212 DEMB, J. B. & SINGER, J. H. 2012. Intrinsic properties and functional circuitry of the All  
1213 amacrine cell.
- 1214 DUAN, X., KRISHNASWAMY, A., DE LA HUERTA, I. & SANES, J. R. 2014. Type II  
1215 cadherins guide assembly of a direction-selective retinal circuit. *Cell*, 158, 793-  
1216 807.
- 1217 DUGUAY, D., FOTY, R. A. & STEINBERG, M. S. 2003. Cadherin-mediated cell  
1218 adhesion and tissue segregation: qualitative and quantitative determinants.  
1219 *Developmental Biology*, 253, 309-323.
- 1220 DUNCAN, L. H., MOYLE, M. W., SHAO, L., SENGUPTA, T., IKEGAMI, R., KUMAR, A.,  
1221 GUO, M., CHRISTENSEN, R., SANTELLA, A., BAO, Z., SHROFF, H., MOHLER,  
1222 W. & COLÓN-RAMOS, D. A. 2019. Isotropic light-sheet microscopy and  
1223 automated cell lineage analyses to catalogue *caenorhabditis elegans*  
1224 embryogenesis with subcellular resolution. *Journal of Visualized Experiments*.
- 1225 DWORAK, H. A., CHARLES, M. A., PELLERANO, L. B. & SINK, H. 2001.  
1226 Characterization of *Drosophila hibris*, a gene related to human nephrin.  
1227 *Development*, 128, 4265-76.
- 1228 ERZBERGER, A., JACOBO, A., DASGUPTA, A. & HUDSPETH, A. J. 2020.  
1229 Mechanochemical symmetry breaking during morphogenesis of lateral-line  
1230 sensory organs. *Nat Phys*, 16, 949-957.
- 1231 FORNITO, A., ZALESKY, A. & BULLMORE, E. T. 2016. *Fundamentals of brain network*  
1232 *analysis*, Amsterdam ; Boston, Elsevier/Academic Press.
- 1233 FOTY, R. A., PFLEGER, C. M., FORGACS, G. & STEINBERG, M. S. 1996. Surface  
1234 tensions of embryonic tissues predict their mutual envelopment behavior.  
1235 *Development*, 122, 1611-1620.

- 1236 FOTY, R. A. & STEINBERG, M. S. 2005. The differential adhesion hypothesis: A direct  
1237 evaluation. *Developmental Biology*.
- 1238 FOTY, R. A. & STEINBERG, M. S. 2013. Differential adhesion in model systems.
- 1239 GABRIEL, JENS P., TRIVEDI, CHINTAN A., MAURER, COLETTE M., RYU, S. &  
1240 BOLLMANN, JOHANN H. 2012. Layer-Specific Targeting of Direction-Selective  
1241 Neurons in the Zebrafish Optic Tectum. *Neuron*, 76, 1147-1160.
- 1242 GALLETTA, B. J., CHAKRAVARTI, M., BANERJEE, R. & ABMAYR, S. M. 2004. SNS:  
1243 Adhesive properties, localization requirements and ectodomain dependence in  
1244 S2 cells and embryonic myoblasts. *Mech Dev*, 121, 1455-68.
- 1245 GARG, P., VERMA, R., NIHALANI, D., JOHNSTONE, D. B. & HOLZMAN, L. B. 2007.  
1246 Neph1 Cooperates with Nephrin To Transduce a Signal That Induces Actin  
1247 Polymerization. *Molecular and Cellular Biology*.
- 1248 GERKE, P., HUBER, T. B., SELLIN, L., BENZING, T. & WALZ, G. 2003.  
1249 Homodimerization and heterodimerization of the glomerular podocyte proteins  
1250 nephrin and NEPH1. *J Am Soc Nephrol*, 14, 918-26.
- 1251 GODT, D. & TEPASS, U. 1998. Drosophila oocyte localization is mediated by  
1252 differential cadherin-based adhesion. *Nature*, 395, 387-391.
- 1253 GONZALEZ-REYES, A. & ST JOHNSTON, D. 1998. The Drosophila AP axis is  
1254 polarised by the cadherin-mediated positioning of the oocyte. *Development*, 125,  
1255 3635-3644.
- 1256 GREER, E. R., PEREZ, C. L., VAN GILST, M. R., LEE, B. H. & ASHRAFI, K. 2008.  
1257 Neural and molecular dissection of a *C. elegans* sensory circuit that regulates fat  
1258 and feeding. *Cell Metab*, 8, 118-31.
- 1259 HAN, J., KAMBER, M. & PEI, J. 2012. 2 - Getting to Know Your Data. In: HAN, J.,  
1260 KAMBER, M. & PEI, J. (eds.) *Data Mining (Third Edition)*. Boston: Morgan  
1261 Kaufmann.
- 1262 JONTES, J. D., BUCHANAN, J. & SMITH, S. J. 2000. Growth cone and dendrite  
1263 dynamics in zebrafish embryos: early events in synaptogenesis imaged in vivo.  
1264 *Nat Neurosci*, 3, 231-7.
- 1265 KATZ, M. J. 1985. How straight do axons grow? *The Journal of Neuroscience*, 5, 589.
- 1266 KIM, B. & EMMONS, S. W. 2017. Multiple conserved cell adhesion protein interactions  
1267 mediate neural wiring of a sensory circuit in *C. elegans*. *Elife*, 6.
- 1268 KIM, K., KIM, R. & SENGUPTA, P. 2010. The HMX/NKX homeodomain protein MLS-2  
1269 specifies the identity of the AWC sensory neuron type via regulation of the *ceh-*  
1270 *36 Otx* gene in *C. elegans*. *Development*, 137, 963-74.
- 1271 KOESTINGER, G., MARTIN, K. A. C., ROTH, S. & RUSCH, E. S. 2017. Synaptic  
1272 connections formed by patchy projections of pyramidal cells in the superficial  
1273 layers of cat visual cortex. *Brain Struct Funct*, 222, 3025-3042.
- 1274 KOLB, H. 1995. *Roles of Amacrine Cells*.
- 1275 KOLODKIN, A. L. & HIESINGER, P. R. 2017. Wiring visual systems: common and  
1276 divergent mechanisms and principles. *Curr Opin Neurobiol*, 42, 128-135.
- 1277 KRIEG, M., ARBOLEDA-ESTUDILLO, Y., PUECH, P. H., KAFER, J., GRANER, F.,  
1278 MULLER, D. J. & HEISENBERG, C. P. 2008. Tensile forces govern germ-layer  
1279 organization in zebrafish. *Nat Cell Biol*, 10, 429-36.
- 1280 KUMAR, A., WU, Y., CHRISTENSEN, R., CHANDRIS, P., GANDLER, W.,  
1281 MCCREEDY, E., BOKINSKY, A., COLÓN-RAMOS, D. A., BAO, Z., MCAULIFFE,

- 1282 M., RONDEAU, G. & SHROFF, H. 2014. Dual-view plane illumination microscopy  
1283 for rapid and spatially isotropic imaging. *Nature Protocols*.
- 1284 KUNZEVITZKY, N. J., WILLEFORD, K. T., FEUER, W. J., ALMEIDA, M. V. &  
1285 GOLDBERG, J. L. 2013. Amacrine cell subtypes differ in their intrinsic neurite  
1286 growth capacity. *Investigative Ophthalmology and Visual Science*.
- 1287 KURAMOCHI, M. & DOI, M. 2019. An Excitatory/Inhibitory Switch From Asymmetric  
1288 Sensory Neurons Defines Postsynaptic Tuning for a Rapid Response to NaCl in  
1289 *Caenorhabditis elegans*. *Frontiers in Molecular Neuroscience*, 11, 484.
- 1290 LIN, D. M., FETTER, R. D., KOPCZYNSKI, C., GRENNINGLOH, G. & GOODMAN, C.  
1291 S. 1994. Genetic analysis of Fasciclin II in *Drosophila*: defasciculation,  
1292 refasciculation, and altered fasciculation. *Neuron*, 13, 1055-69.
- 1293 MARC, R. E., ANDERSON, J. R., JONES, B. W., SIGULINSKY, C. L. & LAURITZEN, J.  
1294 S. 2014. The All amacrine cell connectome: a dense network hub. *Front Neural*  
1295 *Circuits*, 8, 104.
- 1296 MAYNARD, D. M. 1962. Organization of Neuropil. *Am. Zoologist*, 79-96.
- 1297 MELLO, C. & FIRE, A. 1995. DNA Transformation. *Methods in Cell Biology*.
- 1298 MILLARD, S. S. & PECOT, M. Y. 2018. Strategies for assembling columns and layers in  
1299 the *Drosophila* visual system. *Neural Dev*, 13, 11.
- 1300 MINEVICH, G., PARK, D. S., BLANKENBERG, D., POOLE, R. J. & HOBERT, O. 2012.  
1301 CloudMap: A cloud-based pipeline for analysis of mutant genome sequences.  
1302 *Genetics*.
- 1303 MISSAIRE, M. & HINDGES, R. 2015. The role of cell adhesion molecules in visual  
1304 circuit formation: from neurite outgrowth to maps and synaptic specificity. *Dev*  
1305 *Neurobiol*, 75, 569-83.
- 1306 MISSLER, M., SUDHOF, T. C. & BIEDERER, T. 2012. Synaptic cell adhesion. *Cold*  
1307 *Spring Harb Perspect Biol*, 4, a005694.
- 1308 MOYLE, M. W., BARNES, K. M., KUCHROO, M., GONOPOLSKIY, A., DUNCAN, L. H.,  
1309 SENGUPTA, T., SHAO, L., GUO, M., SANTELLA, A., CHRISTENSEN, R.,  
1310 KUMAR, A., WU, Y., MOON, K. R., WOLF, G., KRISHNASWAMY, S., BAO, Z.,  
1311 SHROFF, H., MOHLER, W. A. & COLON-RAMOS, D. A. 2021. Structural and  
1312 developmental principles of neuropil assembly in *C. elegans*. *Nature*, 591, 99-  
1313 104.
- 1314 MURRAY, J. I., BAO, Z., BOYLE, T. J. & WATERSTON, R. H. 2006. The lineaging of  
1315 fluorescently-labeled *Caenorhabditis elegans* embryos with StarryNite and  
1316 AceTree. *Nat Protoc*, 1, 1468-76.
- 1317 NEUMANN-HAEFELIN, E., KRAMER-ZUCKER, A., SLANCHEV, K., HARTLEBEN, B.,  
1318 NOUTSOU, F., MARTIN, K., WANNER, N., RITTER, A., GODEL, M., PAGEL, P.,  
1319 FU, X., MULLER, A., BAUMEISTER, R., WALZ, G. & HUBER, T. B. 2010. A  
1320 model organism approach: defining the role of Neph proteins as regulators of  
1321 neuron and kidney morphogenesis. *Hum Mol Genet*, 19, 2347-59.
- 1322 NEVIN, L. M., TAYLOR, M. R. & BAIER, H. 2008. Hardwiring of fine synaptic layers in  
1323 the zebrafish visual pathway. *Neural Development*.
- 1324 NGUYEN-BA-CHARVET, K. T. & CHEDOTAL, A. 2014. Development of retinal layers.  
1325 *C R Biol*, 337, 153-9.
- 1326 OZKAN, E., CHIA, P. H., WANG, R. R., GORIATCHEVA, N., BOREK, D.,  
1327 OTWINOWSKI, Z., WALZ, T., SHEN, K. & GARCIA, K. C. 2014. Extracellular

- 1328 architecture of the SYG-1/SYG-2 adhesion complex instructs synaptogenesis.  
1329 *Cell*, 156, 482-94.
- 1330 OZTOKATLI, H., HORNBERG, M., BERGHARD, A. & BOHM, S. 2012. Retinoic acid  
1331 receptor and CNGA2 channel signaling are part of a regulatory feedback loop  
1332 controlling axonal convergence and survival of olfactory sensory neurons.  
1333 *FASEB J*, 26, 617-27.
- 1334 PACKER, J. S., ZHU, Q., HUYNH, C., SIVARAMAKRISHNAN, P., PRESTON, E.,  
1335 DUECK, H., STEFANIK, D., TAN, K., TRAPNELL, C., KIM, J., WATERSTON, R.  
1336 H. & MURRAY, J. I. 2019. A lineage-resolved molecular atlas of *C. elegans*  
1337 embryogenesis at single-cell resolution. *Science*, 365.
- 1338 PETROVIC, M. & HUMMEL, T. 2008. Temporal identity in axonal target layer  
1339 recognition. *Nature*.
- 1340 PIGGOTT, B. J., LIU, J., FENG, Z., WESCOTT, S. A. & XU, X. Z. S. 2011. The neural  
1341 circuits and synaptic mechanisms underlying motor initiation in *C. elegans*. *Cell*.
- 1342 POSKANZER, K., NEEDLEMAN, L. A., BOZDAGI, O. & HUNTLEY, G. W. 2003. N-  
1343 cadherin regulates ingrowth and laminar targeting of thalamocortical axons. *The*  
1344 *Journal of neuroscience : the official journal of the Society for Neuroscience*.
- 1345 PRICE, S. R., DE MARCO GARCIA, N. V., RANSCHT, B. & JESSELL, T. M. 2002.  
1346 Regulation of motor neuron pool sorting by differential expression of type II  
1347 cadherins. *Cell*, 109, 205-16.
- 1348 ROBLES, E., FILOSA, A. & BAIER, H. 2013. Precise lamination of retinal axons  
1349 generates multiple parallel input pathways in the tectum. *Journal of*  
1350 *Neuroscience*.
- 1351 RUBINOV, M. & SPORNS, O. 2010. Complex network measures of brain connectivity:  
1352 Uses and interpretations. *NeuroImage*.
- 1353 SABRIN, K., WEI, Y., VAN DEN HEUVEL, M. & DOVROLIS, C. 2019. The hourglass  
1354 organization of the *Caenorhabditis elegans* connectome. *bioRxiv*.
- 1355 SANES, J. R. & ZIPURSKY, S. L. 2010. Design principles of insect and vertebrate  
1356 visual systems. *Neuron*, 66, 15-36.
- 1357 SANES, J. R. & ZIPURSKY, S. L. 2020. Synaptic Specificity, Recognition Molecules,  
1358 and Assembly of Neural Circuits.
- 1359 SARIN, S., PRABHU, S., O'MEARA, M. M., PE'ER, I. & HOBERT, O. 2008.  
1360 *Caenorhabditis elegans* mutant allele identification by whole-genome  
1361 sequencing. *Nature Methods*.
- 1362 SCHINDELIN, J., ARGANDA-CARRERAS, I., FRISE, E., KAYNIG, V., LONGAIR, M.,  
1363 PIETZSCH, T., PREIBISCH, S., RUEDEN, C., SAALFELD, S., SCHMID, B.,  
1364 TINEVEZ, J. Y., WHITE, D. J., HARTENSTEIN, V., ELICEIRI, K., TOMANCAK,  
1365 P. & CARDONA, A. 2012. Fiji: an open-source platform for biological-image  
1366 analysis. *Nat Methods*, 9, 676-82.
- 1367 SCHOTZ, E. M., BURDINE, R. D., JULICHER, F., STEINBERG, M. S., HEISENBERG,  
1368 C. P. & FOTY, R. A. 2008. Quantitative differences in tissue surface tension  
1369 influence zebrafish germ layer positioning. *HFSP J*, 2, 42-56.
- 1370 SCHÜRMAN, F. W. 2016. Fine structure of synaptic sites and circuits in mushroom  
1371 bodies of insect brains.



- 1372 SCHWABE, T., BORYCZ, J. A., MEINERTZHAGEN, I. A. & CLANDININ, T. R. 2019.  
1373 Differential Adhesion Determines the Organization of Synaptic Fascicles in the  
1374 Drosophila Visual System. *Curr Biol*, 29, 715.
- 1375 SCHWARZ, V., PAN, J., VOLTMER-IRSCH, S. & HUTTER, H. 2009. IgCAMs  
1376 redundantly control axon navigation in *Caenorhabditis elegans*. *Neural*  
1377 *Development*.
- 1378 SERIZAWA, S., MIYAMICHI, K., TAKEUCHI, H., YAMAGISHI, Y., SUZUKI, M. &  
1379 SAKANO, H. 2006. A Neuronal Identity Code for the Odorant Receptor-Specific  
1380 and Activity-Dependent Axon Sorting. *Cell*.
- 1381 SHAH, P. K., TANNER, M. R., KOVACEVIC, I., RANKIN, A., MARSHALL, T. E.,  
1382 NOBLETT, N., TRAN, N. N., ROENSPIES, T., HUNG, J., CHEN, Z.,  
1383 SLATCULESCU, C., PERKINS, T. J., BAO, Z. & COLAVITA, A. 2017. PCP and  
1384 SAX-3/Robo Pathways Cooperate to Regulate Convergent Extension-Based  
1385 Nerve Cord Assembly in *C. elegans*. *Developmental cell*, 41, 195-203.e3.
- 1386 SHEN, K. & BARGMANN, C. I. 2003. The immunoglobulin superfamily protein SYG-1  
1387 determines the location of specific synapses in *C. elegans*. *Cell*, 112, 619-30.
- 1388 SHEN, K., FETTER, R. D. & BARGMANN, C. I. 2004. Synaptic specificity is generated  
1389 by the synaptic guidepost protein SYG-2 and its receptor, SYG-1. *Cell*.
- 1390 SMIT, D., FOUQUET, C., PINCET, F., ZAPOTOCKY, M. & TREMBLEAU, A. 2017.  
1391 Axon tension regulates fasciculation/defasciculation through the control of axon  
1392 shaft zippering. *Elife*, 6.
- 1393 SOIZA-REILLY, M. & COMMONS, K. G. 2014. Unraveling the architecture of the dorsal  
1394 raphe synaptic neuropil using high-resolution neuroanatomy. *Front Neural*  
1395 *Circuits*, 8, 105.
- 1396 STEINBERG, M. S. 1962. Mechanism of tissue reconstruction by dissociated cells, II:  
1397 Time-course of events. *Science*.
- 1398 STEINBERG, M. S. 1963. Reconstruction of tissues by dissociated cells. Some  
1399 morphogenetic tissue movements and the sorting out of embryonic cells may  
1400 have a common explanation. *Science*, 141, 401-8.
- 1401 STEINBERG, M. S. 1970. Does differential adhesion govern self-assembly processes in  
1402 histogenesis? Equilibrium configurations and the emergence of a hierarchy  
1403 among populations of embryonic cells. *Journal of Experimental Zoology*, 173,  
1404 395-433.
- 1405 STEINBERG, M. S. & GILBERT, S. F. 2004. Townes and Holtfreter (1955): directed  
1406 movements and selective adhesion of embryonic amphibian cells. *J Exp Zool A*  
1407 *Comp Exp Biol*, 301, 701-6.
- 1408 STEINBERG, M. S. & TAKEICHI, M. 1994. Experimental specification of cell sorting,  
1409 tissue spreading, and specific spatial patterning by quantitative differences in  
1410 cadherin expression. *Proc Natl Acad Sci U S A*, 91, 206-9.
- 1411 STRETTOI, E., RAVIOLA, E. & DACHEUX, R. F. 1992. Synaptic connections of the  
1412 narrow-field, bistratified rod amacrine cell (All) in the rabbit retina. *Journal of*  
1413 *Comparative Neurology*.
- 1414 STRUNKELNBERG, M., BONENGL, B., MODA, L. M., HERTENSTEIN, A., DE  
1415 COUET, H. G., RAMOS, R. G. & FISCHBACH, K. F. 2001. *rst* and its paralogue  
1416 *kirre* act redundantly during embryonic muscle development in *Drosophila*.  
1417 *Development*, 128, 4229-39.

- 1418 TAN, L., ZHANG, K. X., PECOT, M. Y., NAGARKAR-JAISWAL, S., LEE, P. T.,  
1419 TAKEMURA, S. Y., MCEWEN, J. M., NERN, A., XU, S., TADROS, W., CHEN,  
1420 Z., ZINN, K., BELLEN, H. J., MOREY, M. & ZIPURSKY, S. L. 2015. Ig  
1421 Superfamily Ligand and Receptor Pairs Expressed in Synaptic Partners in  
1422 *Drosophila*. *Cell*.
- 1423 TAYLOR, W. R. & SMITH, R. G. 2012. The role of starburst amacrine cells in visual  
1424 signal processing. *Visual Neuroscience*.
- 1425 TESSIER-LAVIGNE, M. & GOODMAN, C. S. 1996. The molecular biology of axon  
1426 guidance. *Science*, 274, 1123-33.
- 1427 TOWLSON, E. K., VÉRTES, P. E., AHNERT, S. E., SCHAFER, W. R. & BULLMORE,  
1428 E. T. 2013. The rich club of the *C. elegans* neuronal connectome. *Journal of*  
1429 *Neuroscience*.
- 1430 VOYIADJIS, A. G., DOUMI, M., CURCIO, E. & SHINBROT, T. 2011. Fasciculation and  
1431 defasciculation of neurite bundles on micropatterned substrates. *Annals of*  
1432 *Biomedical Engineering*.
- 1433 WEIGERT, M., SCHMIDT, U., BOOTHE, T., MÜLLER, A., DIBROV, A., JAIN, A.,  
1434 WILHELM, B., SCHMIDT, D., BROADDUS, C., CULLEY, S., ROCHA-MARTINS,  
1435 M., SEGOVIA-MIRANDA, F., NORDEN, C., HENRIQUES, R., ZERIAL, M.,  
1436 SOLIMENA, M., RINK, J., TOMANCAK, P., ROYER, L., JUG, F. & MYERS, E.  
1437 W. 2018. Content-aware image restoration: pushing the limits of fluorescence  
1438 microscopy. *Nature Methods*.
- 1439 WHITE, J. G., SOUTHGATE, E., THOMSON, J. N. & BRENNER, S. 1983. Factors that  
1440 determine connectivity in the nervous system of *Caenorhabditis elegans*. *Cold*  
1441 *Spring Harbor symposia on quantitative biology*.
- 1442 WHITE, J. G., SOUTHGATE, E., THOMSON, J. N. & BRENNER, S. 1986. The  
1443 structure of the nervous system of the nematode *Caenorhabditis elegans*. *Philos*  
1444 *Trans R Soc Lond B Biol Sci*, 314, 1-340.
- 1445 WITVLIET, D., MULCAHY, B., MITCHELL, J. K., MEIROVITCH, Y., BERGER, D. R.,  
1446 WU, Y., LIU, Y., KOH, W. X., PARVATHALA, R., HOLMYARD, D., SCHALEK, R.  
1447 L., SHAVIT, N., CHISHOLM, A. D., LICHTMAN, J. W., SAMUEL, A. D. T. &  
1448 ZHEN, M. 2020. Connectomes across development reveal principles of brain  
1449 maturation in *C. elegans*. *bioRxiv*, 2020.04.30.066209-2020.04.30.066209.
- 1450 WU, Y., CHANDRIS, P., WINTER, P. W., KIM, E. Y., JAUMOUILLÉ, V., KUMAR, A.,  
1451 GUO, M., LEUNG, J. M., SMITH, C., REY-SUAREZ, I., LIU, H., WATERMAN, C.  
1452 M., RAMAMURTHI, K. S., LA RIVIERE, P. J. & SHROFF, H. 2016. Simultaneous  
1453 multiview capture and fusion improves spatial resolution in wide-field and light-  
1454 sheet microscopy. *Optica*.
- 1455 WU, Y., GHITANI, A., CHRISTENSEN, R., SANTELLA, A., DU, Z., RONDEAU, G.,  
1456 BAO, Z., COLON-RAMOS, D. & SHROFF, H. 2011. Inverted selective plane  
1457 illumination microscopy (iSPIM) enables coupled cell identity lineaging and  
1458 neurodevelopmental imaging in *Caenorhabditis elegans*. *Proc Natl Acad Sci U S*  
1459 *A*, 108, 17708-13.
- 1460 WU, Y., WAWRZUSIN, P., SENSENEY, J., FISCHER, R. S., CHRISTENSEN, R.,  
1461 SANTELLA, A., YORK, A. G., WINTER, P. W., WATERMAN, C. M., BAO, Z.,  
1462 COLÓN-RAMOS, D. A., MCAULIFFE, M. & SHROFF, H. 2013. Spatially isotropic

- 1463 four-dimensional imaging with dual-view plane illumination microscopy. *Nature*  
1464 *Biotechnology*.
- 1465 XIE, X., TABUCHI, M., BROWN, M. P., MITCHELL, S. P., WU, M. N. & KOLODKIN, A.  
1466 L. 2017. The laminar organization of the Drosophila ellipsoid body is semaphorin-  
1467 dependent and prevents the formation of ectopic synaptic connections. *Elife*, 6.
- 1468 XU, C. S., JANUSZEWSKI, M., LU, Z., TAKEMURA, S.-Y., HAYWORTH, K. J.,  
1469 HUANG, G., SHINOMIYA, K., MAITIN-SHEPARD, J., ACKERMAN, D., BERG,  
1470 S., BLAKELY, T., BOGOVIC, J., CLEMENTS, J., DOLAFI, T., HUBBARD, P.,  
1471 KAINMUELLER, D., KATZ, W., KAWASE, T., KHAIRY, K. A., LEAVITT, L., LI, P.  
1472 H., LINDSEY, L., NEUBARTH, N., OLBRIS, D. J., OTSUNA, H., TROUTMAN, E.  
1473 T., UMayAM, L., ZHAO, T., ITO, M., GOLDAMMER, J., WOLFF, T., SVIRSKAS,  
1474 R., SCHLEGEL, P., NEACE, E. R., KNECHT, C. J., ALVARADO, C. X., BAILEY,  
1475 D. A., BALLINGER, S., BORYCZ, J. A., CANINO, B. S., CHEATHAM, N., COOK,  
1476 M., DREHER, M., DUCLOS, O., EUBANKS, B., FAIRBANKS, K., FINLEY, S.,  
1477 FORKNALL, N., FRANCIS, A., HOPKINS, G. P., JOYCE, E. M., KIM, S., KIRK,  
1478 N. A., KOVALYAK, J., LAUCHIE, S. A., LOHFF, A., MALDONADO, C., MANLEY,  
1479 E. A., MCLIN, S., MOONEY, C., NDAMA, M., OGUNDEYI, O., OKEOMA, N.,  
1480 ORDISH, C., PADILLA, N., PATRICK, C., PATERSON, T., PHILLIPS, E. E.,  
1481 PHILLIPS, E. M., RAMPALLY, N., RIBEIRO, C., ROBERTSON, M. K., RYMER,  
1482 J. T., RYAN, S. M., SAMMONS, M., SCOTT, A. K., SCOTT, A. L., SHINOMIYA,  
1483 A., SMITH, C., SMITH, K., SMITH, N. L., SOBESKI, M. A., SULEIMAN, A.,  
1484 SWIFT, J., TAKEMURA, S., TALEBI, I., TARNOGORSKA, D., TENSHAW, E.,  
1485 TOKHI, T., WALSH, J. J., YANG, T., HORNE, J. A., LI, F., PAREKH, R., RIVLIN,  
1486 P. K., JAYARAMAN, V., ITO, K., SAALFELD, S., GEORGE, R.,  
1487 MEINERTZHAGEN, I., et al. 2020. A Connectome of the Adult Drosophila  
1488 Central Brain. *bioRxiv*, 2020.01.21.911859-2020.01.21.911859.
- 1489 YAMAGATA, M. & SANES, J. R. 2008. Dscam and Sidekick proteins direct lamina-  
1490 specific synaptic connections in vertebrate retina. *Nature*.
- 1491 YAMAGATA, M. & SANES, J. R. 2012. Expanding the Ig superfamily code for laminar  
1492 specificity in retina: Expression and role of contactins. *Journal of Neuroscience*.
- 1493 YIP, Z. C. & HEIMAN, M. G. 2018. Ordered arrangement of dendrites within a C.  
1494 elegans sensory nerve bundle. *Elife*, 7.
- 1495 ZHENG, Z., LAURITZEN, J. S., PERLMAN, E., ROBINSON, C. G., NICHOLS, M.,  
1496 MILKIE, D., TORRENS, O., PRICE, J., FISHER, C. B., SHARIFI, N., CALLE-  
1497 SCHULER, S. A., KMECOVA, L., ALI, I. J., KARSH, B., TRAUTMAN, E. T.,  
1498 BOGOVIC, J. A., HANSLOVSKY, P., JEFFERIS, G. S. X. E., KAZHDAN, M.,  
1499 KHAIRY, K., SAALFELD, S., FETTER, R. D. & BOCK, D. D. 2018. A Complete  
1500 Electron Microscopy Volume of the Brain of Adult Drosophila melanogaster. *Cell*,  
1501 174, 730-743.e22.  
1502

Fig 1

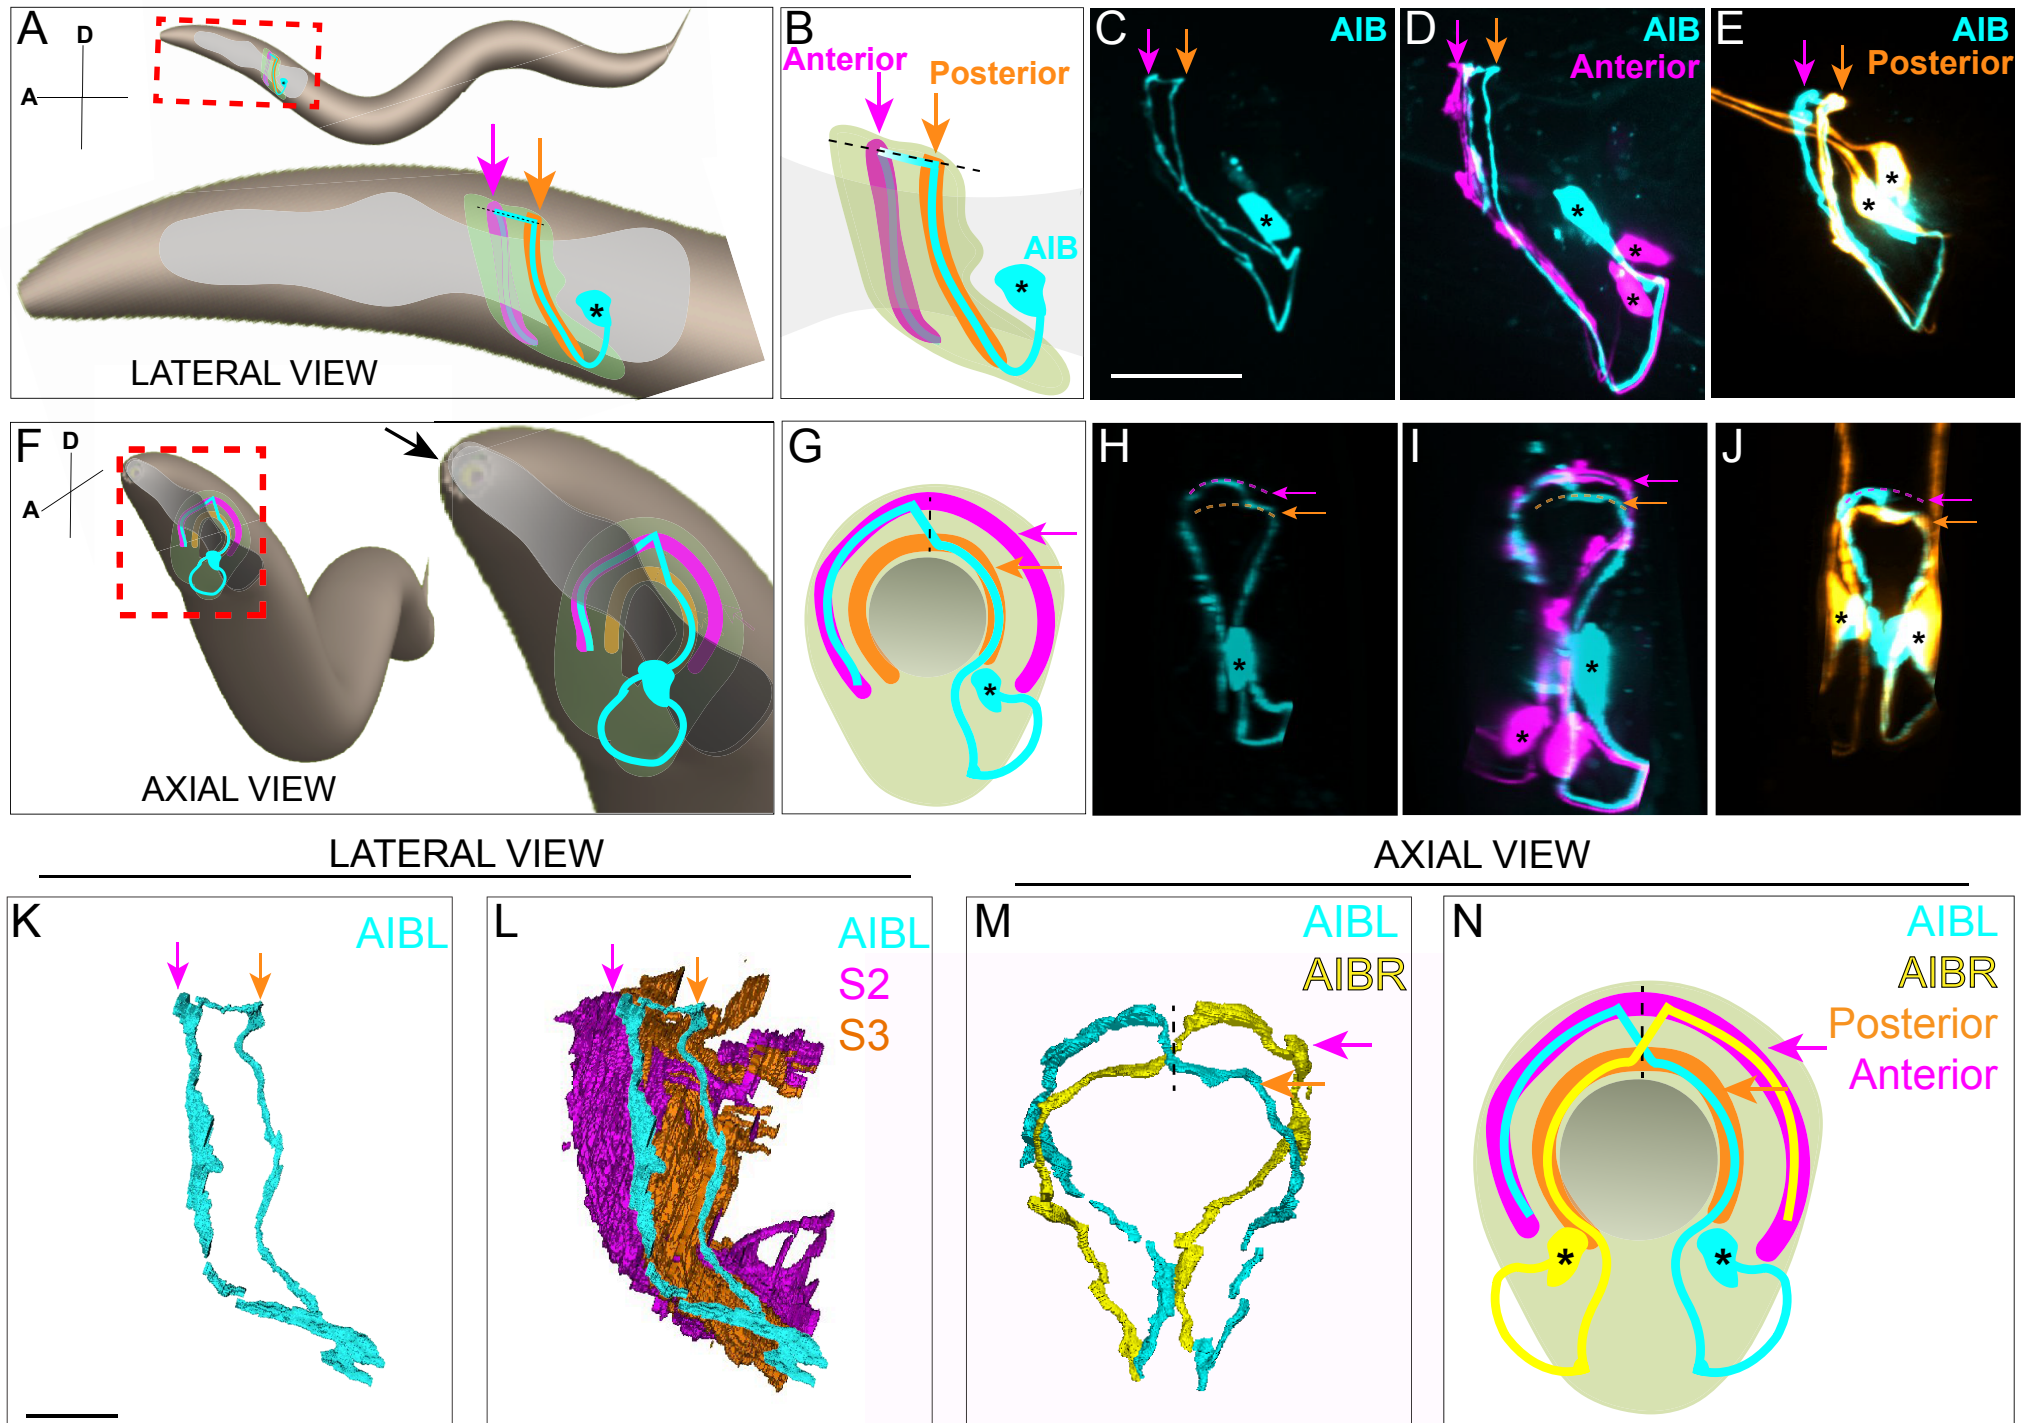

Fig 2

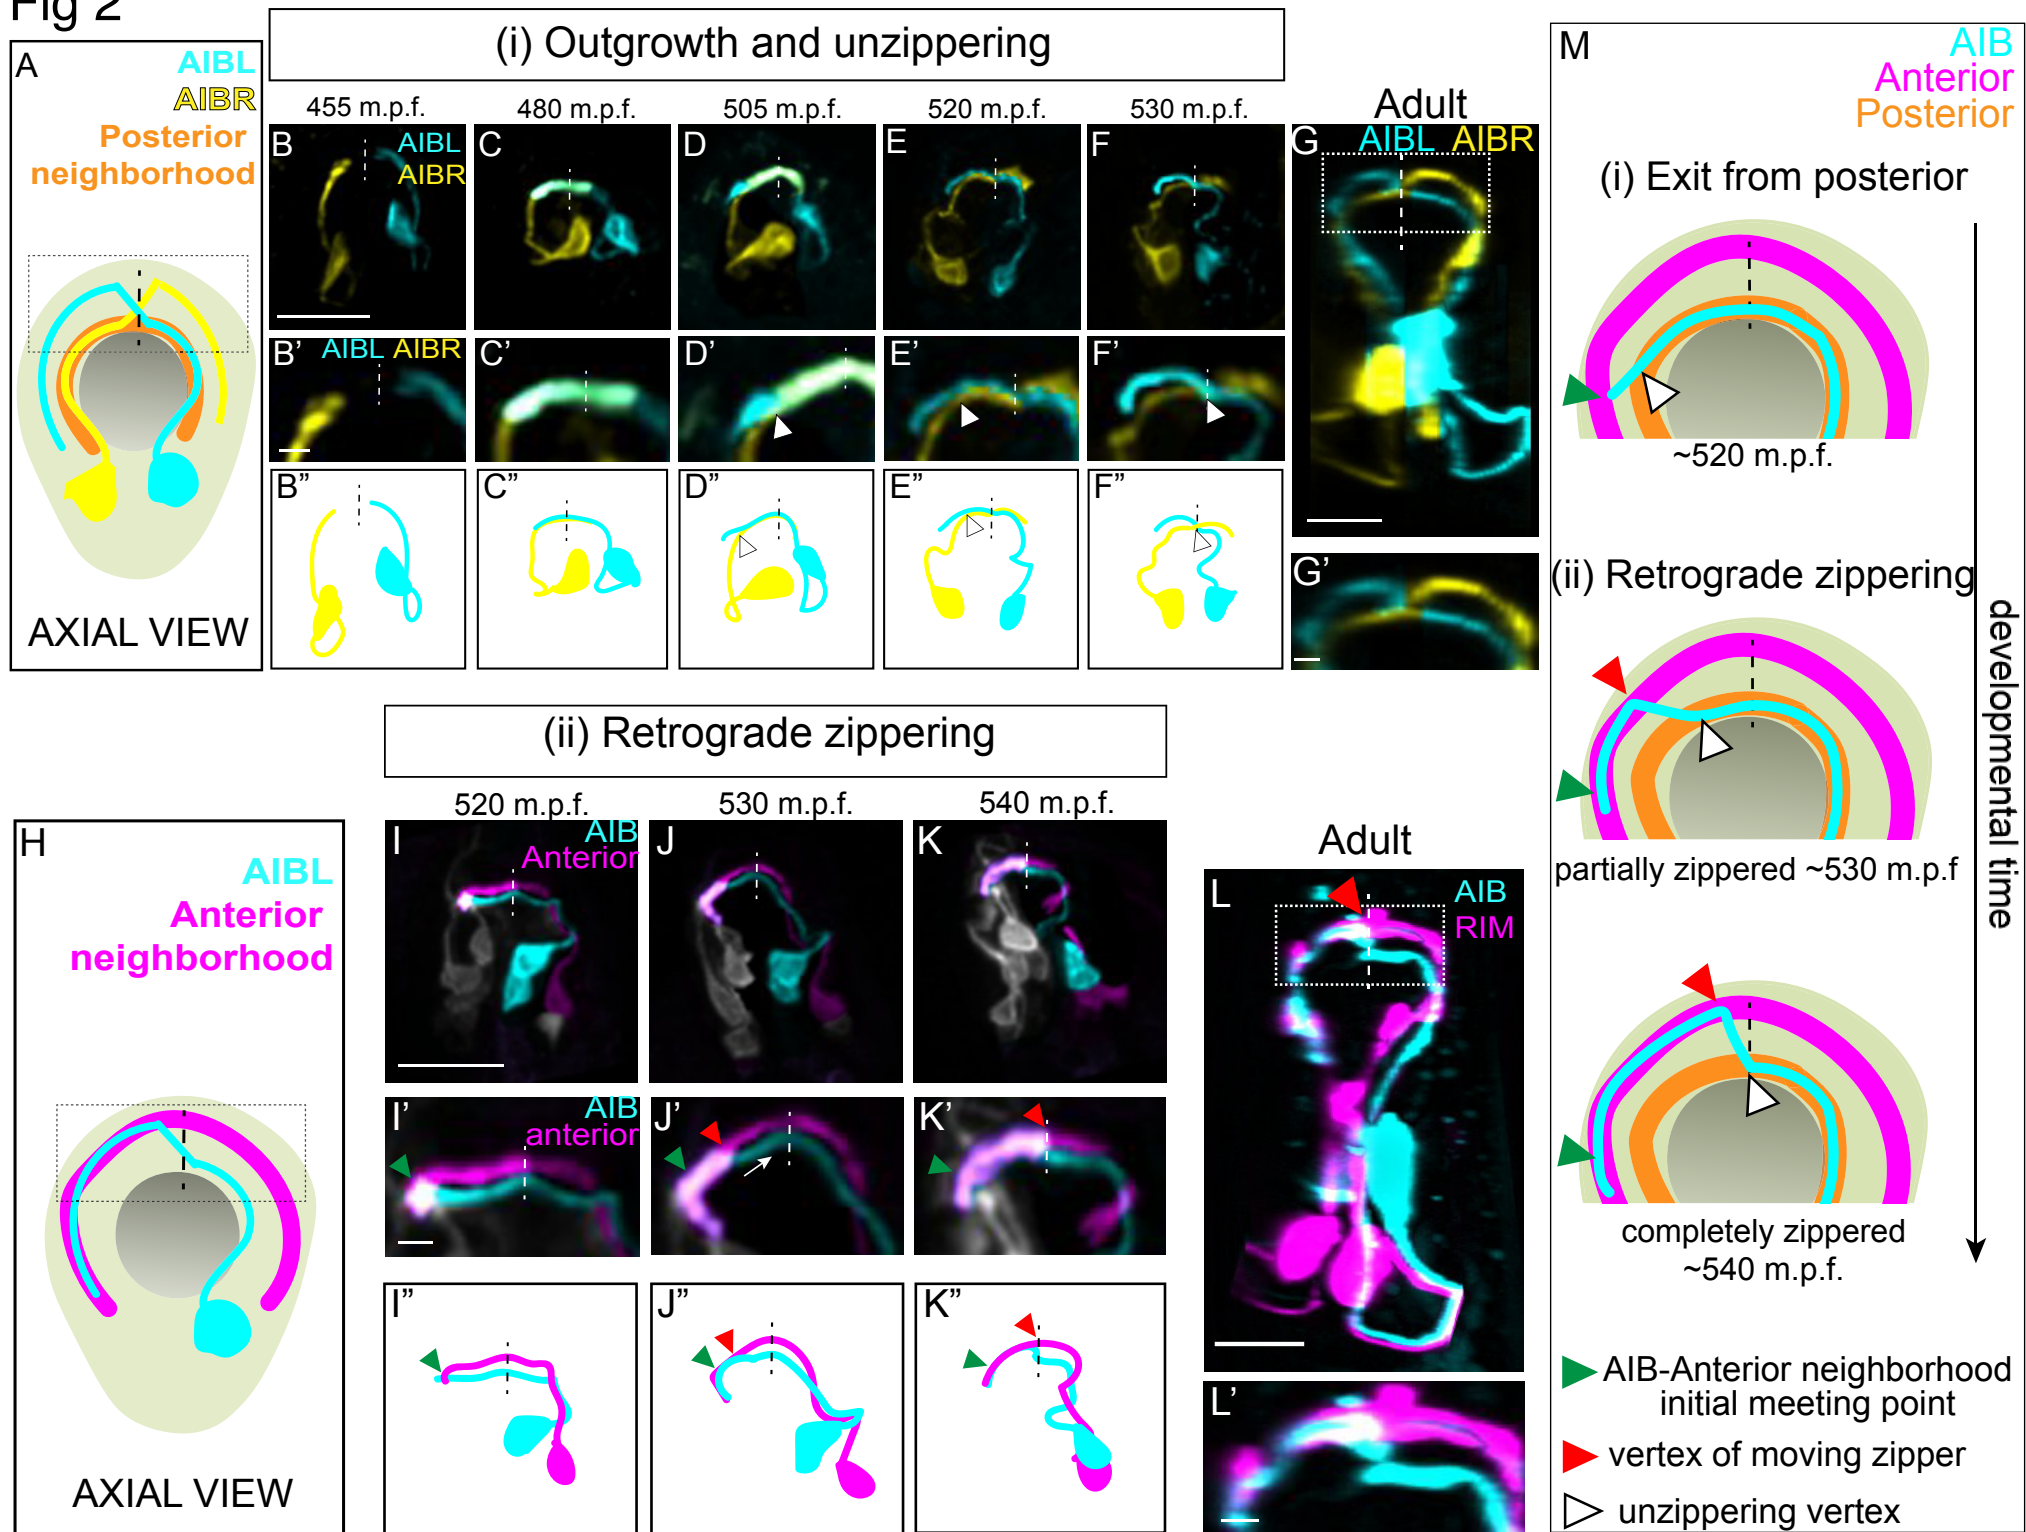

Fig 3

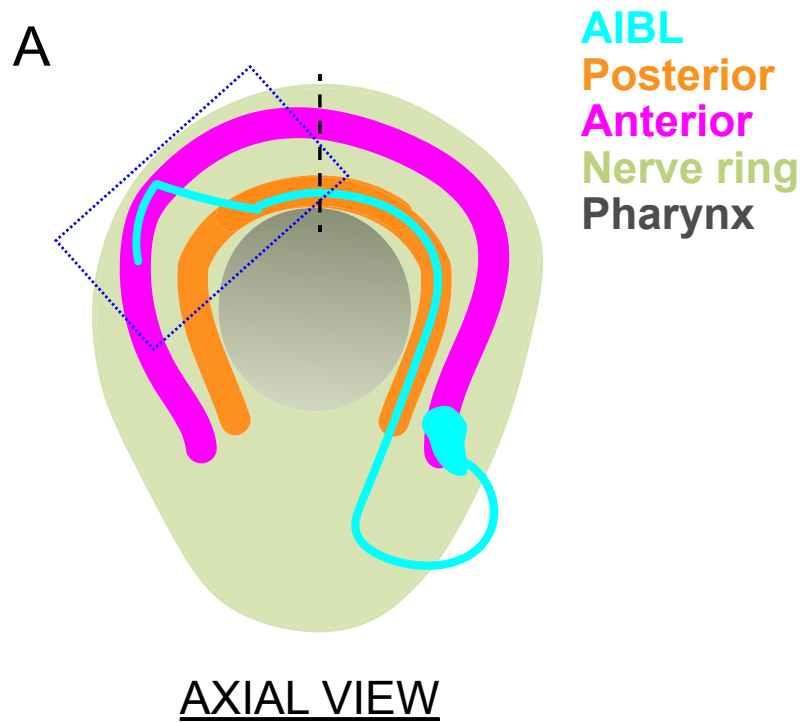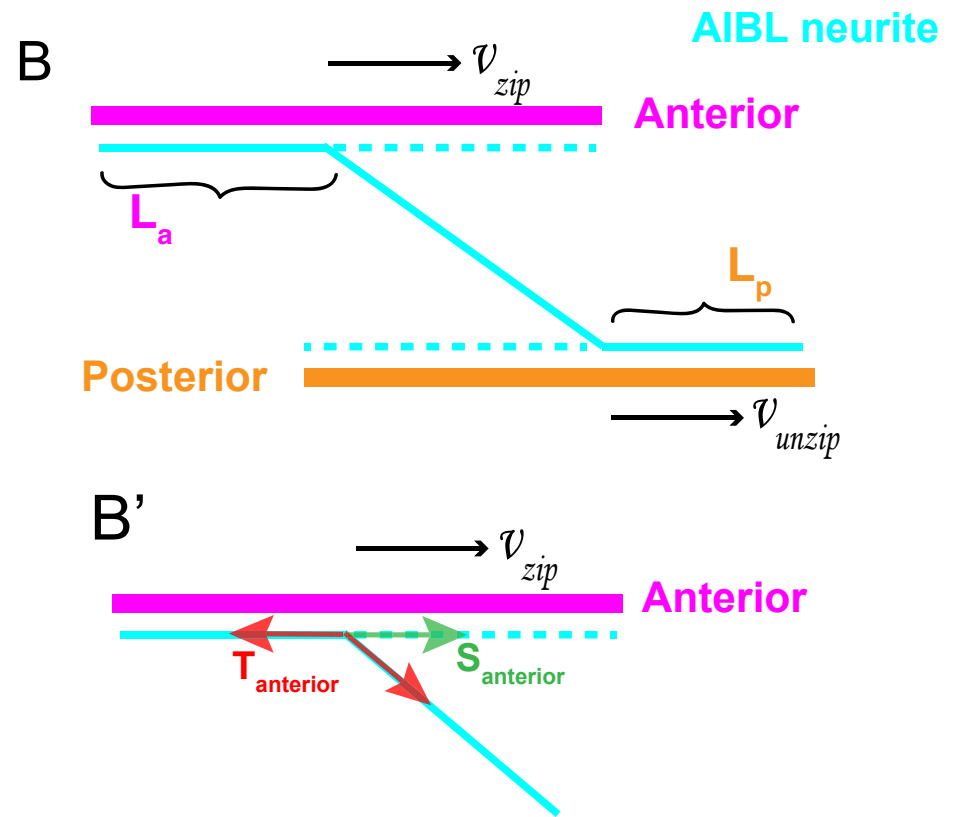

**C** AIB neurite position in Anterior/Posterior neighborhoods

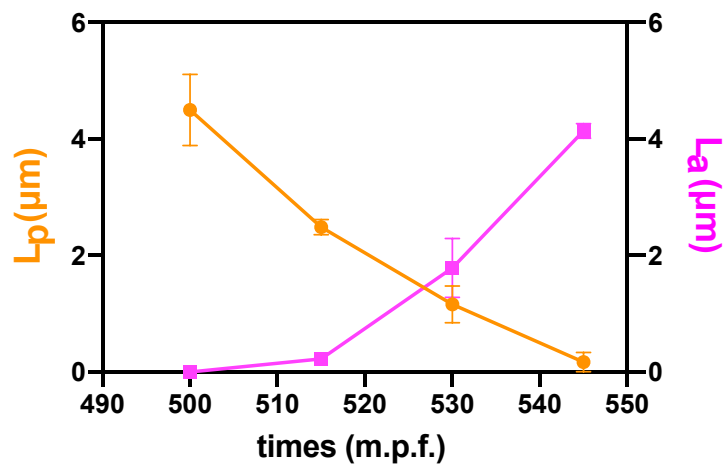

**D** Zippering velocities

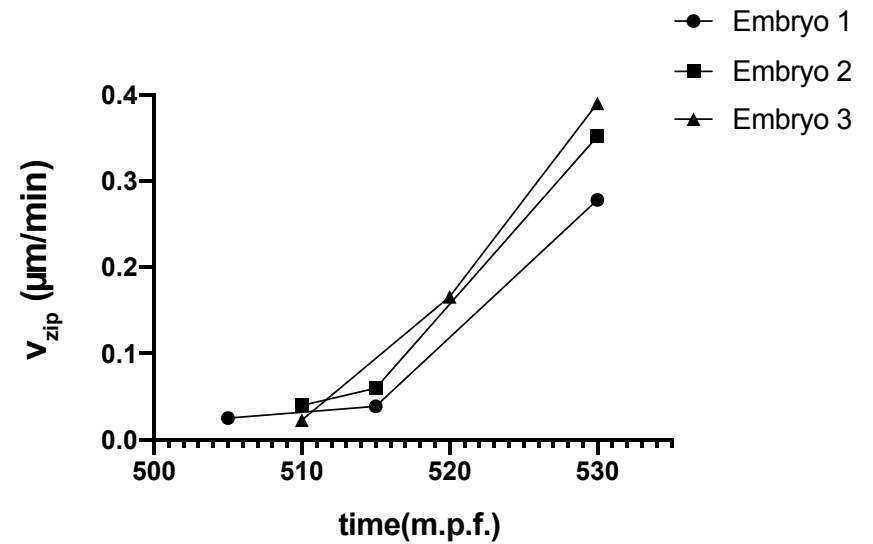

Fig 4

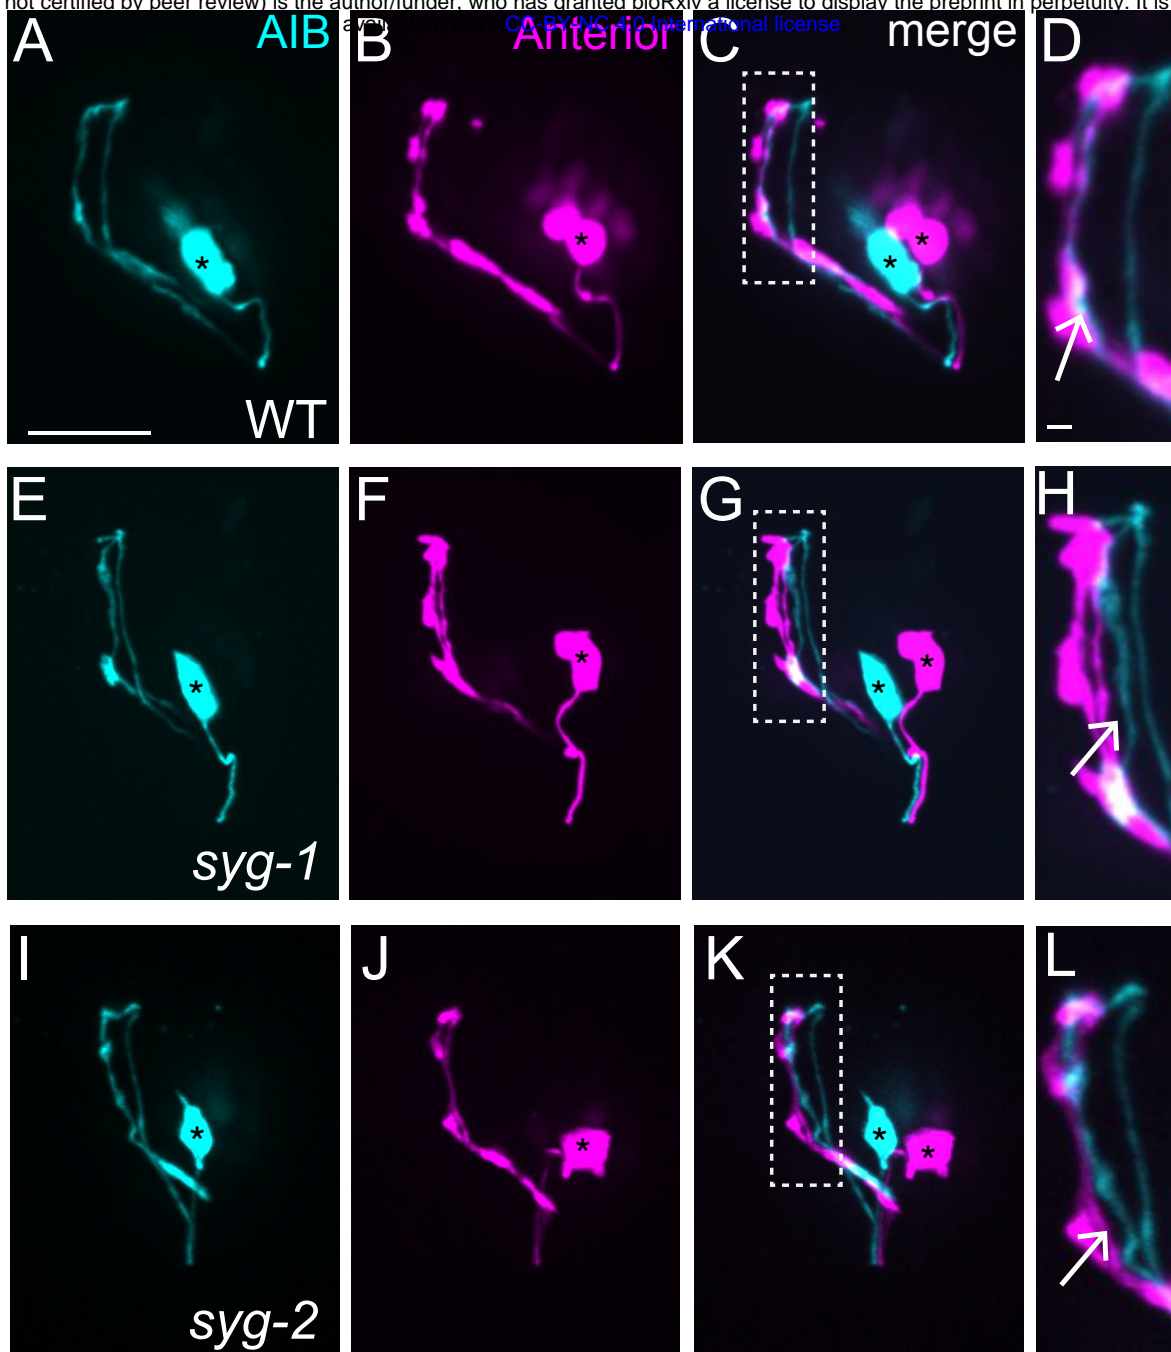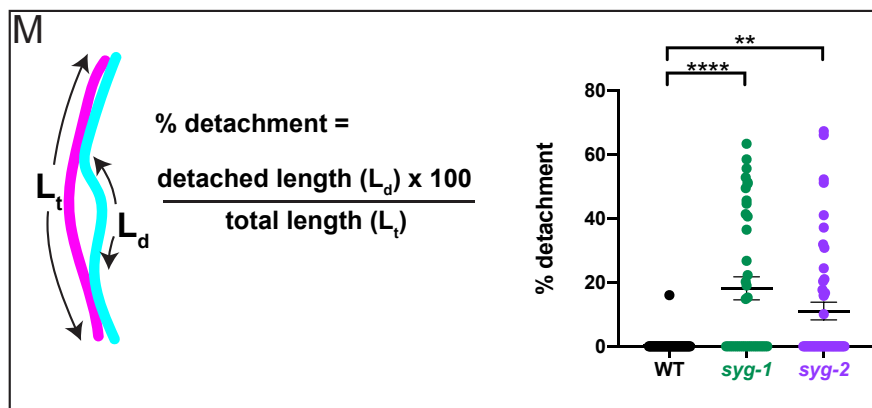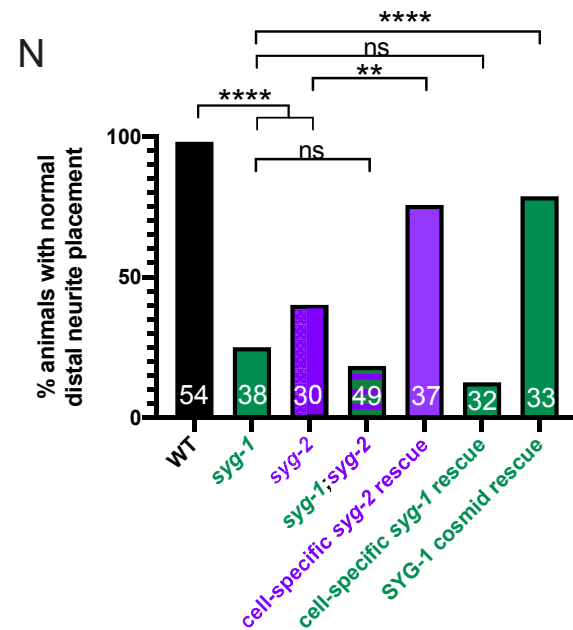

Fig 5

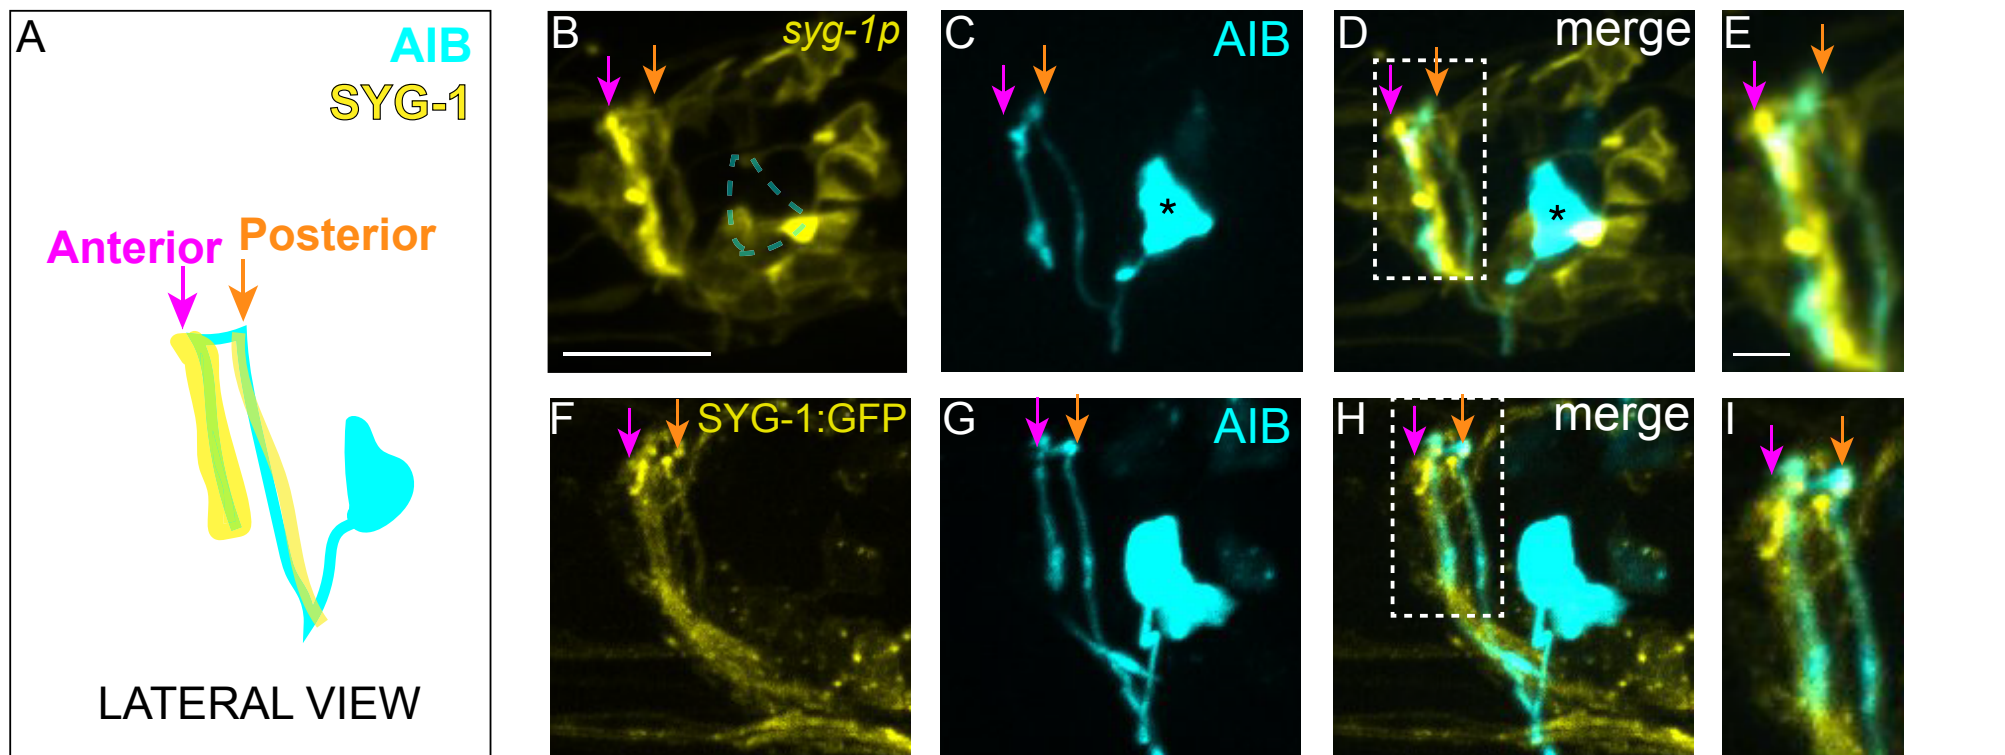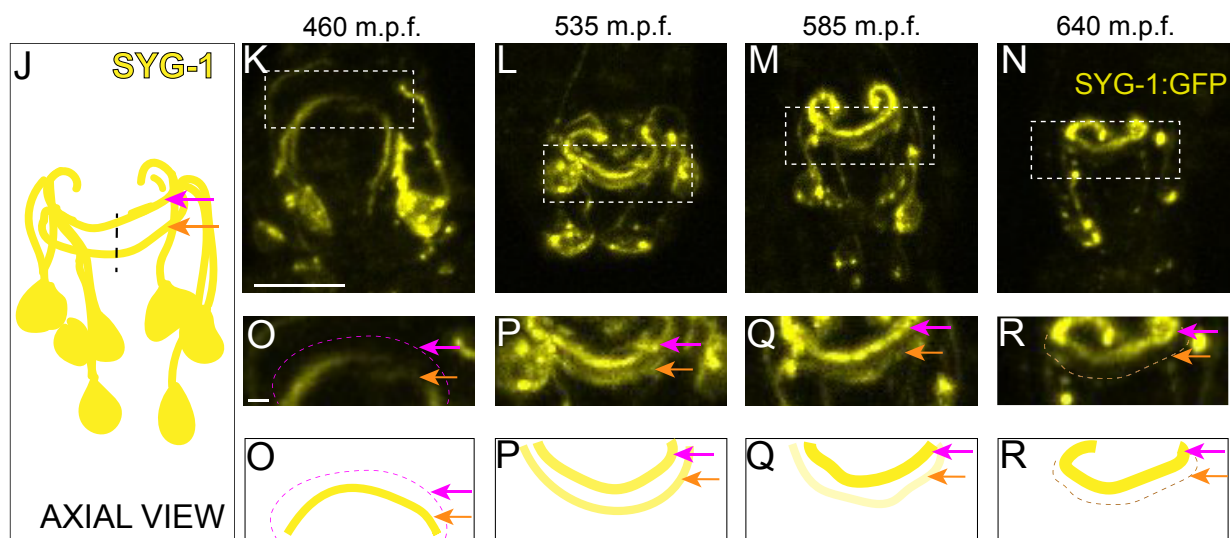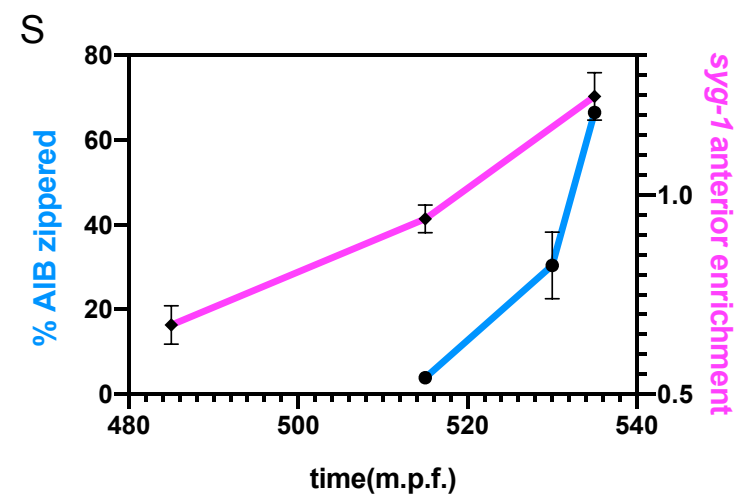



# Fig 6

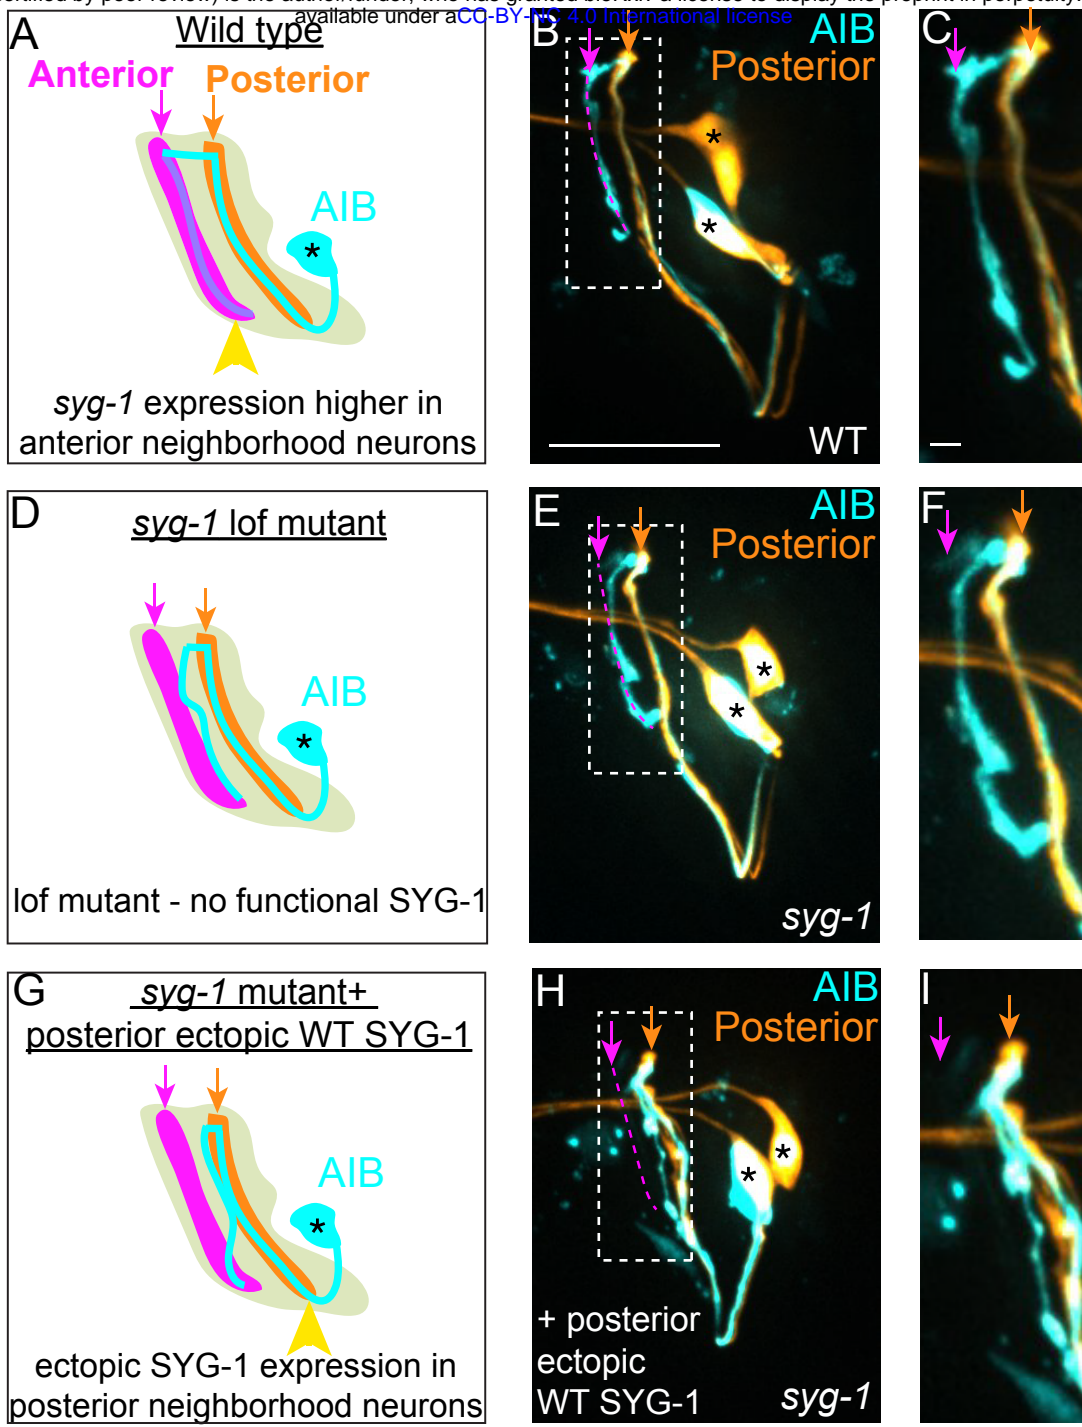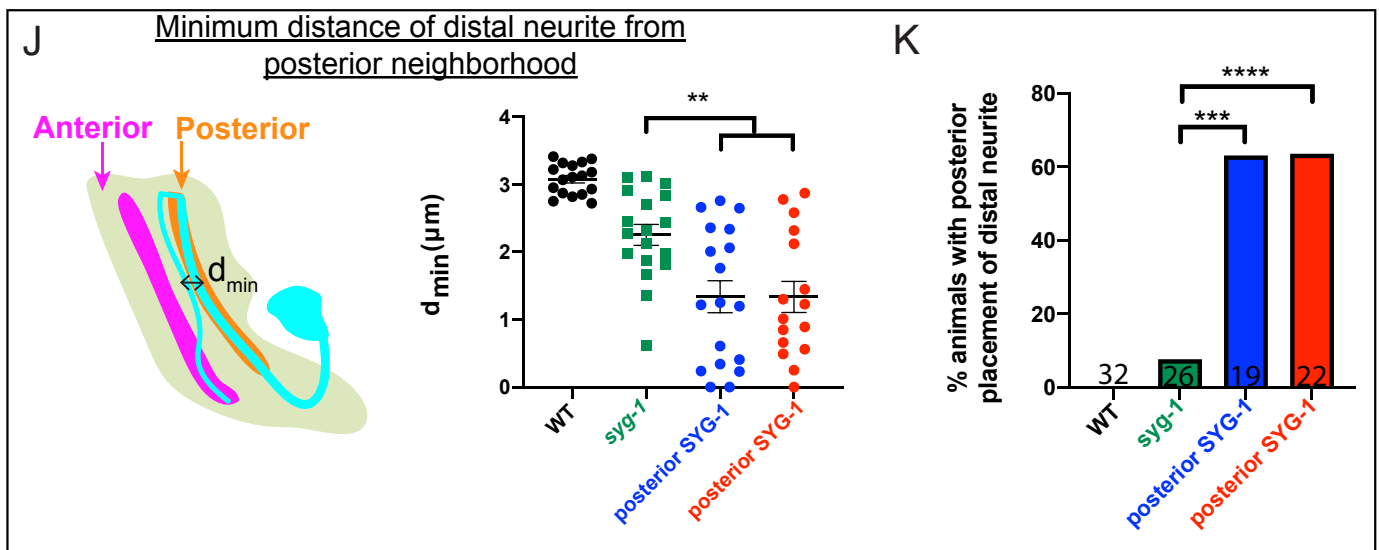

Fig 7

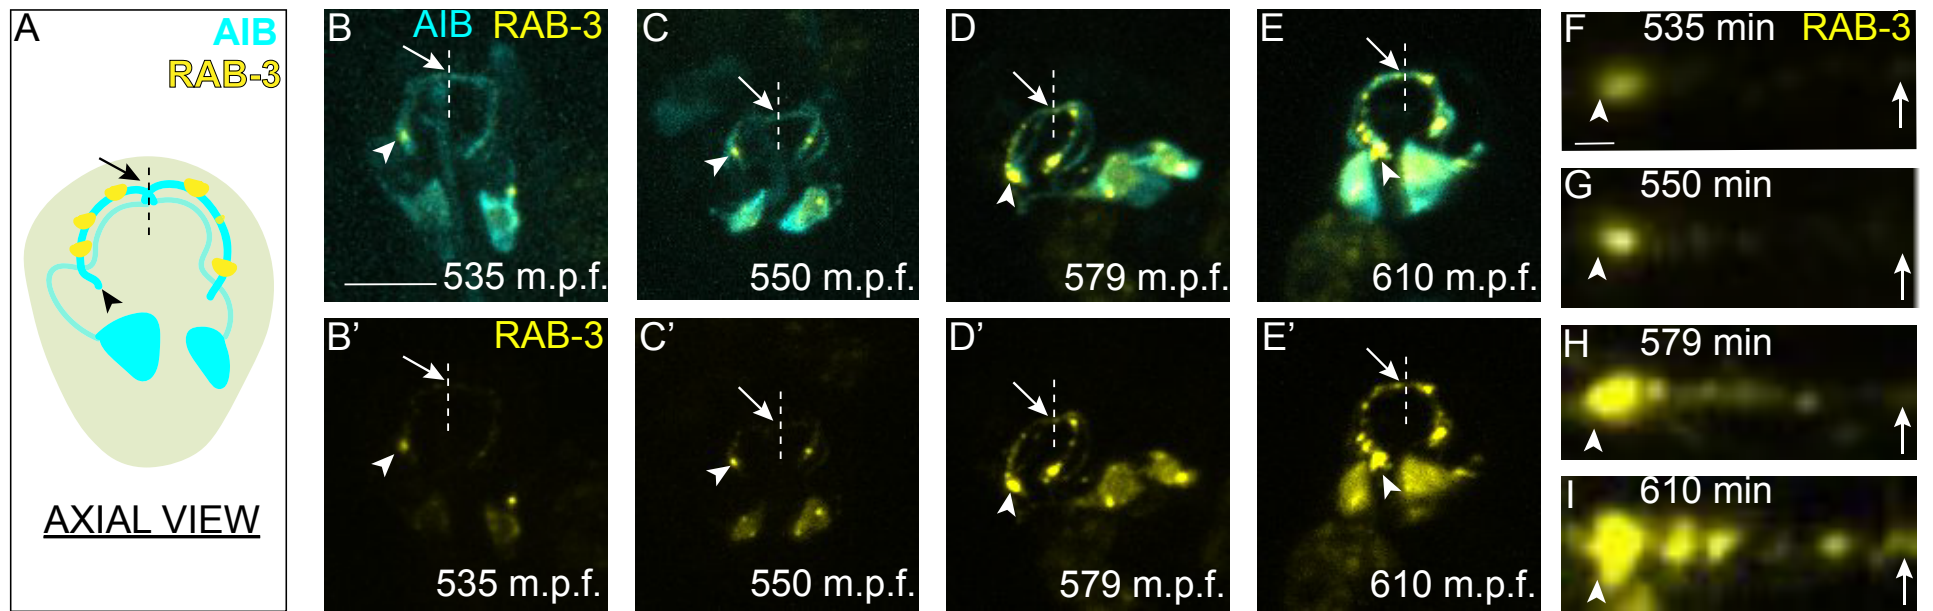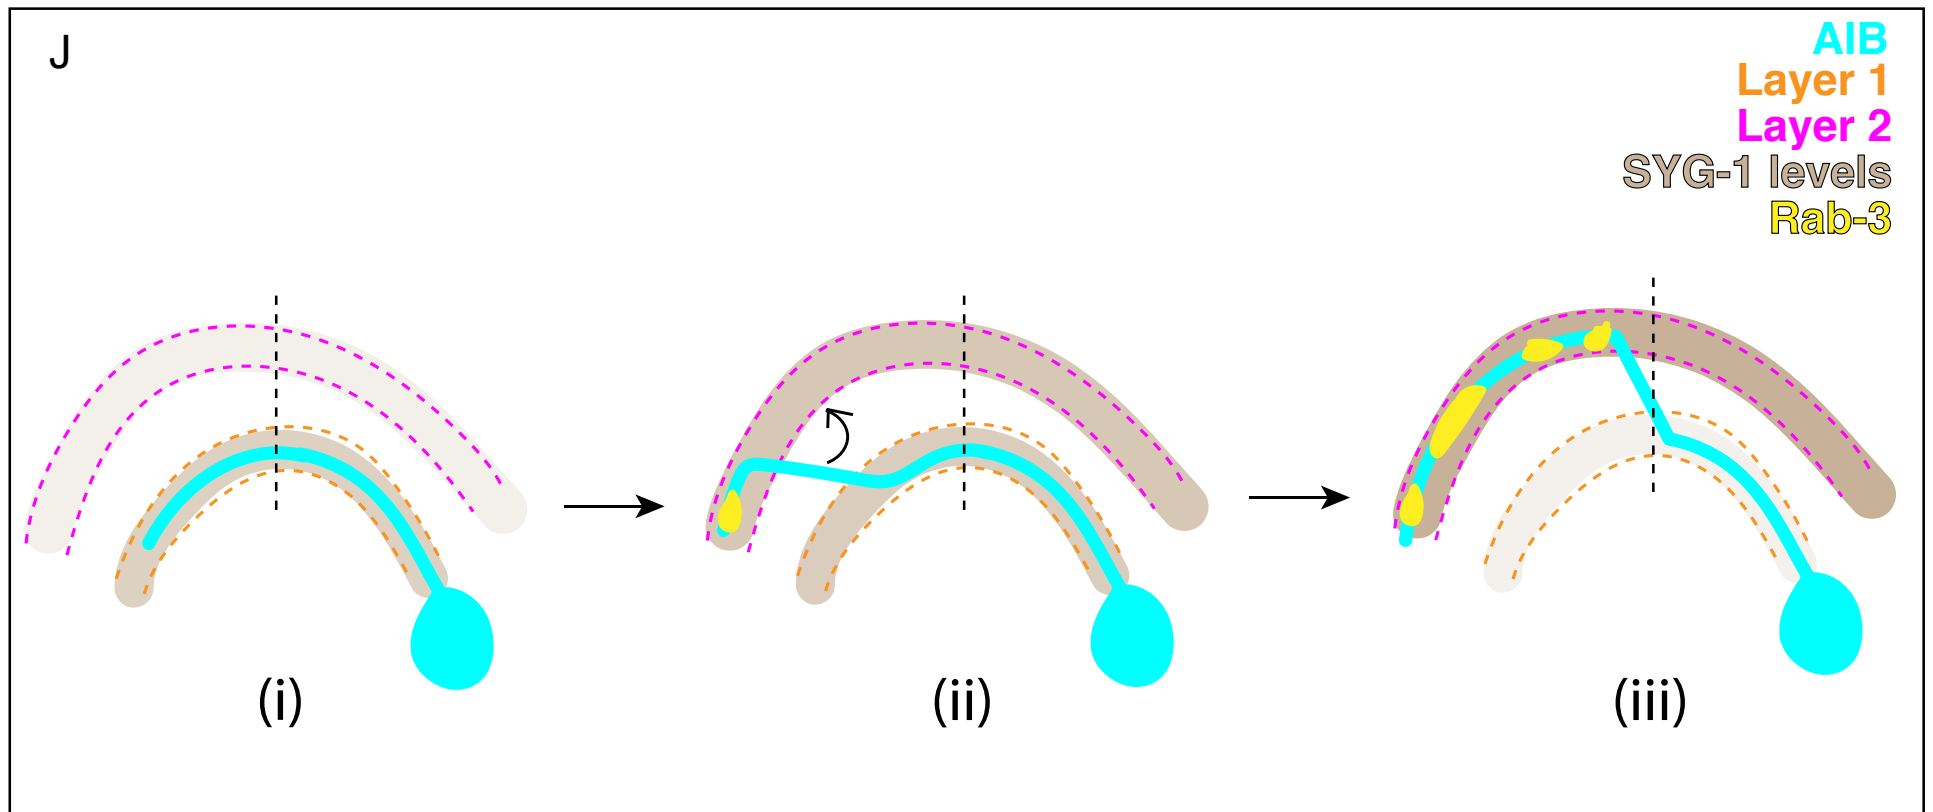

Source: https://www.biorxiv.org/content/biorxiv/early/2021/06/03/2020.08.28.271437.full.pdf
